# Supplementary material
Source: PubMed Central journal article supplement (PMC8225920)

## Supplement to: Phase 2 Study of Ibrutinib in Classic and Variant Hairy Cell Leukemia

### Table of Contents:

|                                                                                        |    |
|----------------------------------------------------------------------------------------|----|
| Supplement to: Phase 2 Study of Ibrutinib in Classic and Variant Hairy Cell Leukemia.. | 1  |
| Eligibility Criteria.....                                                              | 2  |
| Institutions Enrolling Patients .....                                                  | 8  |
| Supplemental Methods.....                                                              | 9  |
| Table S1: <i>BRAF</i> V600E Testing.....                                               | 14 |
| Table S2: Prior Treatments for Hairy Cell Leukemia .....                               | 16 |
| Table S3. Ibrutinib Dose and Exposure.....                                             | 21 |
| Table S4. Reason for Study Discontinuation.....                                        | 23 |
| Table S5: Response to Ibrutinib .....                                                  | 24 |
| Table S6: Responses by Histologic Subtype.....                                         | 25 |
| Table S7: Univariate Associations Between Patient Characteristics and Outcome.....     | 26 |
| Table S8: Frequency of Treatment-Related Adverse Events .....                          | 27 |
| Table S9: Frequency of All Adverse Events (n=37 patients) .....                        | 36 |
| Table S10: Analysis of Adverse Events by Dose Level .....                              | 56 |
| Table S11: Summary of Non-Compartmental Pharmacokinetics Parameters.....               | 57 |
| Table S12: Hazard ratios for associations between PK parameters and PFS.....           | 59 |
| Figure S1: Progression-Free and Overall Survival by Histologic Subtype.....            | 60 |
| Figure S2: Progression-Free and Overall Survival by Dose Level .....                   | 61 |
| Figure S3: Median Time to Recovery of Peripheral Blood Counts .....                    | 62 |
| Figure S4: Change in Peripheral Blood Counts During Treatment.....                     | 63 |
| Figure S5: Plasma Concentration of Ibrutinib and Major Metabolite .....                | 64 |
| Figure S6: Association of Pharmacokinetic Parameters and Response to Ibrutinib.....    | 66 |
| Figure S7: Association of Pharmacokinetic Parameters and Disease Characteristics.      | 67 |
| Figure S8: Association of Pharmacokinetic Parameters and Adverse Events.....           | 70 |
| Figure S9: Pharmacodynamic Measures .....                                              | 76 |

## Eligibility Criteria

### Inclusion Criteria

- Histologically confirmed diagnosis of Hairy Cell Leukemia or variant according to WHO criteria with any of the following indications for therapy:
  - Hemoglobin < 11 g/dL
  - Platelet count < 100,000/ $\mu$ L
  - Absolute neutrophil count < 1,000/ $\mu$ L
  - Progressive or symptomatic splenomegaly or hepatomegaly
  - Enlarging lymphadenopathy  $\geq$  2 cm
  - Absolute lymphocyte count > 5,000/mL
  - Disease related constitutional symptoms consisting of unexplained weight loss exceeding 10% of body weight over the preceding 6 months, CTEP active version of the CTCAE grade 2 or 3 fatigue, fevers >100.5° F or night sweats for greater than 2 weeks without evidence of infection.
- Patients with Classic Hairy Cell Leukemia may receive therapy under the following conditions:
  - After at least 1 prior purine nucleoside analog-containing regimen, (Fludarabine, Pentostatin, or Cladribine)
  - Or relapsed or de novo disease if deemed medically unfit for therapy with a purine nucleoside analog
- Because there is no recognized standard of care for patients with Variant Hairy Cell Leukemia, both previously treated and previously untreated patients with this diagnosis will be eligible.

- Age >18 years.
- ECOG performance status <2 (Karnofsky >60%).
- Life expectancy of greater than 12 months.
- Patients will be required to meet the following laboratory parameters:
  - Creatinine  $\leq$  2.0 mg/dL, and/or creatinine clearance (estimated GFR [Cockcroft-Gault])  $\geq$ 30 mL/min
  - Total bilirubin  $\leq$  1.5 x ULN (unless disease related or due to Gilbert's disease)
  - AST  $\leq$  3.0 x ULN (unless disease related)
  - PT/INR <1.5 x ULN and PTT (aPTT) <1.5 x ULN
- Because patients with HCL are typically pancytopenic at presentation for treatment, patients will be eligible without respect to baseline peripheral blood cell counts if they otherwise meet inclusion criteria.
- The effects of ibrutinib on the developing human fetus are unknown. For this reason, and because tyrosine kinase inhibitors may be teratogenic, women of child-bearing potential and men must agree to use adequate contraception (hormonal or barrier method of birth control; abstinence) prior to study entry.
- Female patients who are of non-reproductive potential (i.e., post-menopausal by history - no menses for  $\geq$ 1 year; OR history of hysterectomy; OR history of bilateral tubal ligation; OR history of bilateral oophorectomy). Female patients of childbearing potential must have a negative serum pregnancy test upon study entry.
- Male and female patients who agree to use highly effective methods of birth control (e.g., condoms, implants, injectables, combined oral contraceptives, some intrauterine devices [IUDs], complete sexual abstinence, or sterilized partner) during the period of

therapy and for 90 days after the last dose of study drug.

- Ability to understand and the willingness to sign a written informed consent document.

#### Exclusion Criteria

- Chemotherapy <21 days prior to first administration of study treatment and/or monoclonal antibody <6 weeks prior to first administration of study treatment.
- Patients who are receiving any other investigational agents.
- Patients with known brain metastases should be excluded from this clinical trial because of their poor prognosis and because they often develop progressive neurologic dysfunction that would confound the evaluation of neurologic and other adverse events.
- History of allergic reactions attributed to compounds of similar chemical or biologic composition as ibrutinib.
- Ibrutinib is extensively metabolized by CYP3A4/5. Patients who received a strong cytochrome P450 (CYP) 3A inhibitor within 7 days prior to the first dose of ibrutinib or patients who require continuous treatment with a strong CYP3A inhibitor. Therefore, any medications or substances that are strong inhibitors of CYP3A4/5 should be discontinued. Patients unable to change these medications must be excluded from participation.
- Uncontrolled intercurrent illness including, but not limited to, ongoing or active infection, symptomatic congestive heart failure, unstable angina pectoris, cardiac arrhythmia, or psychiatric illness/social situations that would limit compliance with study requirements.

- Recent infections requiring systemic treatment need to have completed therapy >14 days before the first dose of study drug.
- Pregnant women are excluded from this study because ibrutinib is a tyrosine kinase inhibitor with the potential for teratogenic or abortifacient effects.
- Because there is an unknown but potential risk for adverse events in nursing infants secondary to treatment of the mother with ibrutinib, breastfeeding should be discontinued if the mother is treated with ibrutinib.
- HIV-positive patients will be eligible unless they have been previously diagnosed with an AIDS-defining illness.
- Patients who require anticoagulation with warfarin (Coumadin) or who have taken warfarin within 28 days prior to enrollment are not eligible due to a potential increased risk of hemorrhage. Patients who are currently taking vitamin K antagonists are also ineligible for this study.
- Patients requiring daily corticosteroids at a prednisone equivalent of  $\geq 20$  mg daily should not be enrolled. If corticosteroids can be discontinued (or reduced to <20 mg per day of prednisone or equivalent), the discontinuation or dose reduction should be done at least 7 days prior to first dose.
- Prior exposure to a BTK inhibitor.
- Major surgery within 4 weeks of first dose of study drug.
- A history of prior malignancy, with the exception of the following:
  - Malignancy treated with curative intent and with no evidence of active disease present for more than 3 years prior to screening, and felt to be at low risk for recurrence by the treating physician.

- Adequately treated non-melanomatous skin cancer or lentigo maligna melanoma without current evidence of disease.
- Adequately treated cervical carcinoma in situ without current evidence of disease.
- Currently active clinically significant cardiovascular disease such as: uncontrolled arrhythmia, congestive heart failure, or Class 3 or 4 congestive heart failure as defined by the New York Heart Association Functional Classification or history of myocardial infarction, unstable angina, or acute coronary syndrome within 6 months prior to first dose with study drug.
- Patient is unable to swallow capsules, or has disease significantly affecting gastrointestinal function or resection of the stomach or small bowel, or symptomatic inflammatory bowel disease or ulcerative colitis, or partial or complete bowel obstruction.
- History of stroke or intracranial hemorrhage within 6 months prior to enrollment.
- Serologic status reflecting active hepatitis B or C infection. Patients that are positive for hepatitis B core antibody, hepatitis B surface antigen (HBsAg), or hepatitis C antibody must have a negative polymerase chain reaction (PCR) prior to enrollment. (PCR positive patients will be excluded).
- Concurrent systemic immunosuppressant therapy other than corticosteroids (e.g., cyclosporine A, tacrolimus, etc.) within 28 days of the first dose of study drug.
- Vaccinated with live, attenuated vaccines within 4 weeks of first dose of study drug.
- Unresolved toxicities from prior anti-cancer therapy, defined as having not resolved to Common Terminology Criteria for Adverse Event (CTCAE, version 5), grade  $\leq 1$ , or to the levels dictated in the inclusion/exclusion criteria with the exception of alopecia.

- Known bleeding disorders (e.g., von Willebrand's disease) or hemophilia.
- Unwilling or unable to participate in all required study evaluations and procedures.
- Currently active, clinically significant hepatic impairment ( $\geq$  moderate hepatic Impairment according to the NCI/Child Pugh classification).

## **Institutions Enrolling Patients**

Barbara Ann Karmanos Cancer Institute, Wayne State University School of Medicine

The Ohio State University

Mayo Clinic

MD Anderson Cancer Center

National Institutes of Health



## **Supplemental Methods**

### *Plasma sample collection and pharmacokinetic (PK) analysis*

Ibrutinib was administered at two dose levels 420 and 840mg. Blood samples were collected in heparin tubes at baseline prior to ibrutinib administration and at 30 minutes, 1-, 2-, 4-, 6- and 24-hour post dose on days 1 and 8 of cycle 1. Blood samples were centrifuged at 1,200 rpm for 10 minutes at 4°C, supernatant withdrawn and aliquoted, and then stored at -70°C until analysis. Plasma samples were analyzed using a validated liquid chromatography-tandem mass spectrometry (LC-MS/MS) assay. Concentration-time data was used to generate ibrutinib pharmacokinetic parameters via non-compartmental methods.

To determine PK parameters (maximum plasma concentration [ $C_{max}$ ] and area under the plasma concentration-time curve [AUC], time to reach  $C_{max}$  [ $T_{max}$ ], clearance [CL], volume of distribution [Vd], terminal half-life [ $t_{1/2}$ ]) for each patient, we used ibrutinib concentration-time data and conducted standard non-compartmental analysis in Phoenix WinNonlin Professional v 8.0 (Pharsight, Mountain View, CA). Data from 20 patients were used to conduct non-compartmental analysis and generate plasma-concentration time plots. A two-sided t-test was used for comparisons of  $C_{max}$  and  $AUC_{0-6}$  values between day 1 and day 8.

### *Flow Cytometry*

Samples of ACDA anticoagulated blood procured via venipuncture at different time points prior to, during, and following treatment were analyzed. All samples were transferred to the Ohio State University clinical flow cytometry laboratory and were

immediately processed upon receipt. Prior to staining all samples were tested for viability using 7AAD method. Only samples with viability of at least 95% were accepted for further analysis. All samples were stained using set of optimally titrated directly conjugated monoclonal antibodies as detailed in the table below. Multiparametric analysis was performed with a gating strategy based on CD45 staining and light side scatter characteristics that allow good separation of lymphocyte, monocyte and myeloid cell populations and immunophenotype characterization according to the table. Detailed characterization of the B lymphocytes was performed using sequential gating and Prism plot utility in a fashion that allows discrimination between cells subsets based on permutations of multiple parameters. After pathologist review, the results were be reported as % of lymphocyte gate and % of total leukocytes analyzed and calculated number of B lymphocytes per microliter of blood.

| <b>Fluorochrome</b> |          | <b>FITC</b> | <b>PE</b> | <b>ECD</b> | <b>PC5</b> | <b>PC7</b> | <b>APC 700</b> | <b>PACIFIC BLUE</b> | <b>KROME ORANGE</b> |
|---------------------|----------|-------------|-----------|------------|------------|------------|----------------|---------------------|---------------------|
| <b>Viability</b>    | Marker   | CD45        |           | CD19       | 7AAD       |            | CD2            |                     |                     |
|                     | Antibody | BC 20µL     |           | BC 10µL    | BC 20µL    |            | BC 5µL         |                     |                     |
| <b>Tube 1</b>       | Marker   | CD103       | CD11C     | CD19       | CD25       | CD45       |                |                     |                     |
|                     | Antibody | BC 20µL     | BC 20µL   | BC 10µL    | BC 10µL    | BC 5µL     |                |                     |                     |
| <b>Tube 2</b>       | Marker   | CD20        | CD123     | CD19       | CD27       | CD45       |                |                     |                     |
|                     | Antibody | BC 10µL     | BD 20µL   | BC 10µL    | BC 10µL    | BC 5µL     |                |                     |                     |
| <b>Tube 3</b>       | Marker   | KAPPA A     | LAMBDA    | CD19       | CD5        |            | CD10           | CD20                | CD45                |

|                                               |          |              |              |            |           |  |           |           |  |
|-----------------------------------------------|----------|--------------|--------------|------------|-----------|--|-----------|-----------|--|
|                                               | Antibody | Dako<br>10µL | Dako<br>10µL | BC<br>10µL | BC<br>5µL |  | BC<br>5µL | BC<br>5µL |  |
| BC = Beckman Coulter, BD = Beckton Dickenson. |          |              |              |            |           |  |           |           |  |

### *Immunohistochemistry*

Tissue sections of decalcified bone marrow were cut at a thickness of 4 microns and were then baked in a 65°C oven for 60 minutes. Slides were then placed onto the Leica Bond III (Leica Biosystems, Buffalo Grove, IL) platform for deparaffinization and staining. The slides were deparaffinized online using Leica Bond Dewax and 100% alcohol. The slides were then antigen retrieved using the Leica Bond ER2 (AR9640) for 20 minutes. The tissue was then quenched with hydrogen peroxide for 5 minutes to block any endogenous peroxidase. The tissue was then incubated with PAX5 (clone 1EW Leica Biosystems, Buffalo Grove, IL) at a dilution of 1:100 for 30 minutes. The slides were then treated with Leica Bond Post Primary reagent (part of the Leica Bond Polymer Refine detection DS9800) for 8 minutes. Leica Bond DAB was then applied and incubated for 10 minutes. Tissue sections were then incubated with pERK (clone Erk1-2, Cell Signaling, Danvers, MA) at a dilution of 1:200 for 15 minutes. Slides were then incubated with Leica Bond Polymer AP (DS9390) for 30 minutes and then incubated with Leica Red Chromogen (Fast Red) for 15 minutes. Slides were then counterstained with Leica Hematoxylin for 5 minutes then dehydrated through graded alcohols and xylene before being cover slipped.

Pictures of immunohistochemical stains were taken with the 40X/0.75 objectives (Olympus UPlan FL N) of an Olympus BX51 microscope equipped with an Olympus

SC100 digital camera, using the AnalySIS getIT software. All immunohistochemistry was done at the Ohio State University.

#### *BTK and PLCG2 Mutation Analysis*

*BTK* and *PLCG2* mutation detection was performed using previously reported methods. Briefly, genomic DNA was extracted using the EZ1 (Qiagen, Chatsworth, CA) from B-cells that were purified by anti-CD19 immunoaffinity using Robo-Sep S (Stem Cell Technologies, Vancouver BC). Using a custom-designed AmpliSeq panel that covered the entire coding regions of *BTK* and *PLCG2*, library preparation and DNA sequencing was performed using the Ion Chef and S5 sequencer (ThermoFisher, San Diego, CA). The mean sequencing depth was 2000-6000 reads per sample, with a validated sensitivity for *BTK/PLCG2* resistance mutations of 0.5%.

Reference: Jones D, Woyach JA, Zhao W, Caruthers S, Tu H, Coleman J, Byrd JC, Johnson AJ, Lozanski G. *PLCG2* C2 domain mutations co-occur with *BTK* and *PLCG2* resistance mutations in chronic lymphocytic leukemia undergoing ibrutinib treatment. *Leukemia*. 2017; 31(7):1645-1647.

#### *BRAF V600E Mutation Detection by ddPCR*

Genomic DNA was extracted using the QIAamp DNA Mini Kit (QIAGEN, Germany) and DNA concentrations were measured using Qubit (Thermo Fisher, USA). Determination of the Detection Limit of the ddPCR-Based *BRAF* V600E Multiplex Assay. The limit of detection is an important performance parameter to be established for

validation of ddPCR measurements, and is defined as the lowest mutant allele fraction (MAF) that can be reliably detected and is distinguishable from the background or negative control. For the determination of the limit of detection of the BRAF V600E multiplex assay, a positive control mutant DNA (A375 Cell line carrying the *BRAF* V600E mutation) was diluted in a background of *BRAF* wild-type DNA (TL-1 Cell line) to obtain a series of standard samples with the desired MAF range (50%, 10%, 1%, 0.1%).

Detection of *BRAF* p.V600E c.1799T>A mutation was performed using QX200 droplet-digital PCR system (Bio-Rad). Each 22.0  $\mu$ L ddPCR reaction mixture contained: 1X BRAF V600E multiplex assay reagent (Bio-Rad) which includes 900 nM primers and 250 nM each probe (wild-type probe labeled with HEX dye and mutant probe labeled with FAM dye), 1X ddPCR Supermix for probes (no dUTP); (Bio-Rad), and 50ng of DNA template. Volume adjusted to 22.0  $\mu$ L with DEPC-treated water. 20.0  $\mu$ L were loaded for droplet generation using QX200 Droplet Generator (Bio-Rad) and moved into a 96-well plate. Amplifications were performed on a C1000 deep-well thermal cycler (Bio-Rad) using the following conditions: 1 cycle of 95 °C for 5 min, 45 cycles of 95 °C for 30 s and 57 °C for 1 min, 1 cycle of 4 °C for 5 min, 1 cycle of 95 °C for 5 min and hold at 12 °C. Fractional abundance and quantitative results for each sample were calculated using QuantaSoft Analysis Pro software version 1.0.5 (Bio-Rad) following the principle of Poisson distribution.

**Table S1: BRAF V600E Testing**

| <b>Subject Number</b> | <b>Histology</b>     | <b>BRAF Status</b> | <b>IHC Stain</b> | <b>Sequencing</b> |
|-----------------------|----------------------|--------------------|------------------|-------------------|
| 1                     | Classic              | Mutated            | Yes              | No                |
| 2                     | Variant              | Unmutated          | No               | Yes               |
| 3                     | Classic              | Mutated            | No               | Yes*              |
| 4                     | Variant              | Unmutated          | No               | Yes               |
| 5                     | Classic              | Unmutated          | No               | Yes               |
| 6                     | Classic              | Mutated            | Yes              | Yes               |
| 7                     | Classic              | Mutated            | No               | Yes*              |
| 8                     | Classic              | Unmutated          | Yes              | Yes               |
| 9                     | Classic              | Unknown            | No               | No                |
| 10                    | Classic <sup>+</sup> | Mutated            | No               | Yes*              |
| 11                    | Classic              | Mutated            | Yes              | No                |
| 12                    | Classic              | Mutated            | Yes              | No                |
| 13                    | Classic              | Unmutated          | No               | Yes               |
| 14                    | Classic              | Mutated            | No               | Yes*              |
| 15                    | Classic              | Unmutated          | Yes              | No                |
| 16                    | Variant              | Unmutated          | Yes              | No                |
| 17                    | Variant              | Unmutated          | No               | Yes               |
| 18                    | Classic              | Unmutated          | Yes              | Yes               |
| 19                    | Variant              | Unmutated          | Yes              | No                |
| 20                    | Variant              | Unmutated          | Yes              | No                |
| 21                    | Classic              | Mutated            | No               | Yes               |
| 22                    | Variant              | Unmutated          | Yes              | No                |
| 23                    | Classic              | Mutated            | Yes              | No                |
| 25                    | Classic              | Mutated            | Yes              | No                |
| 26                    | Classic              | Mutated            | Yes              | No                |
| 27                    | Variant              | Unmutated          | No               | Yes-              |
| 28                    | Variant              | Unmutated          | Yes              | No                |
| 29                    | Classic              | Mutated            | No               | Yes               |
| 30                    | Classic              | Mutated            | Yes              | No                |

|    |                      |           |     |     |
|----|----------------------|-----------|-----|-----|
| 31 | Classic              | Unmutated | No  | Yes |
| 32 | Classic              | Mutated   | Yes | No  |
| 33 | Classic              | Mutated   | Yes | No  |
| 34 | Classic <sup>+</sup> | Mutated   | No  | Yes |
| 35 | Classic              | Mutated   | Yes | No  |
| 36 | Classic              | Mutated   | Yes | No  |
| 37 | Classic              | Mutated   | No  | Yes |
| 39 | Classic              | Unmutated | No  | Yes |

IHC = Immunohistochemistry. Note that there is no subject 24 or 38 due to patients who were found to be ineligible at screening and received a study number but did not start study treatment. \*Sequenced by ddPCR research assay. +Histology was originally entered as variant and confirmed to be classic after review of pathology reports and *BRAF* mutation testing.

**Table S2: Prior Treatments for Hairy Cell Leukemia**

| <b>Subject</b> | <b>Number Prior Treatments</b> | <b>Prior Treatments in Chronological Order</b>                                                                                                                                                              |
|----------------|--------------------------------|-------------------------------------------------------------------------------------------------------------------------------------------------------------------------------------------------------------|
| <b>1</b>       | 10                             | 1. Splenectomy<br>2. Interferon-alpha<br>3. Cladribine<br>4. Cladribine<br>5. Rituximab<br>6. Rituximab<br>7. Local radiation<br>8. Pentostatin + rituximab<br>9. Rituximab<br>10. Bendamustine + rituximab |
| <b>2</b>       | 2                              | 1. Cladribine<br>2. Splenectomy                                                                                                                                                                             |
| <b>3</b>       | 1                              | 1. Cladribine                                                                                                                                                                                               |
| <b>4</b>       | 0                              |                                                                                                                                                                                                             |
| <b>5</b>       | 4                              | 1. Cladribine<br>2. BL22 immunotoxin<br>3. Pentostatin + rituximab<br>4. Splenectomy                                                                                                                        |
| <b>6</b>       | 4                              | 1. Cladribine<br>2. Rituximab<br>3. Rituximab<br>4. Rituximab                                                                                                                                               |
| <b>7</b>       | 4                              | 1. Splenectomy<br>2. Cladribine<br>3. Cladribine<br>4. Cladribine                                                                                                                                           |
| <b>8</b>       | 6                              | 1. Cladribine<br>2. Cladribine<br>3. Cladribine<br>4. Pentostatin<br>5. Moxetumomab pasudotox<br>6. Cladribine + rituximab                                                                                  |
| <b>9</b>       | 3                              | 1. Rituximab<br>2. Cladribine<br>3. Cladribine                                                                                                                                                              |
| <b>10</b>      | 3                              | 1. Cladribine<br>2. Cladribine<br>3. Rituximab                                                                                                                                                              |



|           |    |                                                                                                                                                                                                                                                                                                                                        |
|-----------|----|----------------------------------------------------------------------------------------------------------------------------------------------------------------------------------------------------------------------------------------------------------------------------------------------------------------------------------------|
| <b>11</b> | 12 | <ol style="list-style-type: none"> <li>1. Splenectomy</li> <li>2. Halotestin</li> <li>3. Prednisone</li> <li>4. Chlorambucil</li> <li>5. Chlorambucil</li> <li>6. Interferon-alpha</li> <li>7. Rituximab</li> <li>8. Rituximab</li> <li>9. Rituximab</li> <li>10. Rituximab</li> <li>11. Rituximab</li> <li>12. Vemurafenib</li> </ol> |
| <b>12</b> | 4  | <ol style="list-style-type: none"> <li>1. Cladribine</li> <li>2. Rituximab</li> <li>3. Cladribine</li> <li>4. Moxetumomab pasudotox</li> </ol>                                                                                                                                                                                         |
| <b>13</b> | 1  | <ol style="list-style-type: none"> <li>1. Cladribine + rituximab</li> </ol>                                                                                                                                                                                                                                                            |
| <b>14</b> | 6  | <ol style="list-style-type: none"> <li>1. Interferon</li> <li>2. Pentostatin</li> <li>3. Cladribine</li> <li>4. Fludarabine</li> <li>5. Rituximab</li> <li>6. Rituximab</li> </ol>                                                                                                                                                     |
| <b>15</b> | 1  | <ol style="list-style-type: none"> <li>1. Cladribine</li> </ol>                                                                                                                                                                                                                                                                        |
| <b>16</b> | 2  | <ol style="list-style-type: none"> <li>1. Rituximab</li> <li>2. Cladribine</li> </ol>                                                                                                                                                                                                                                                  |
| <b>17</b> | 5  | <ol style="list-style-type: none"> <li>1. Cladribine</li> <li>2. Splenectomy</li> <li>3. Rituximab</li> <li>4. Chlorambucil</li> <li>5. Moxetumomab pasudotox</li> </ol>                                                                                                                                                               |
| <b>18</b> | 6  | <ol style="list-style-type: none"> <li>1. Cladribine</li> <li>2. Cladribine</li> <li>3. Splenectomy</li> <li>4. Rituximab</li> <li>5. Interferon B</li> <li>6. Pentostatin + rituximab</li> </ol>                                                                                                                                      |
| <b>19</b> | 0  |                                                                                                                                                                                                                                                                                                                                        |
| <b>20</b> | 8  | <ol style="list-style-type: none"> <li>1. Interferon</li> <li>2. Cladribine</li> <li>3. Pentostatin</li> <li>4. Fludarabine</li> </ol>                                                                                                                                                                                                 |

|            |   |                                                                                                                                                                                                                                                       |
|------------|---|-------------------------------------------------------------------------------------------------------------------------------------------------------------------------------------------------------------------------------------------------------|
|            |   | <ol style="list-style-type: none"> <li>5. Chlorambucil</li> <li>6. Rituximab</li> <li>7. BL22</li> <li>8. Splenectomy</li> </ol>                                                                                                                      |
| <b>21</b>  | 8 | <ol style="list-style-type: none"> <li>1. Splenectomy</li> <li>2. Chlorambucil</li> <li>3. Chlorambucil</li> <li>4. Interferon B</li> <li>5. Cladribine</li> <li>6. Cladribine + rituximab</li> <li>7. Vemurafenib</li> <li>8. Vemurafenib</li> </ol> |
| <b>22</b>  | 6 | <ol style="list-style-type: none"> <li>1. Splenectomy</li> <li>2. Cladribine</li> <li>3. Rituximab</li> <li>4. Bendamustine</li> <li>5. Cyclophosphamide</li> <li>6. Bendamustine</li> </ol>                                                          |
| <b>23</b>  | 6 | <ol style="list-style-type: none"> <li>1. Splenectomy</li> <li>2. Cladribine</li> <li>3. Cladribine</li> <li>4. Cladribine + rituximab</li> <li>5. Pentostatin</li> <li>6. Rituximab</li> </ol>                                                       |
| <b>25</b>  | 1 | <ol style="list-style-type: none"> <li>1. Cladribine + rituximab</li> </ol>                                                                                                                                                                           |
| <b>26</b>  | 2 | <ol style="list-style-type: none"> <li>1. Cladribine</li> <li>2. Pentostatin</li> </ol>                                                                                                                                                               |
| <b>27</b>  | 7 | <ol style="list-style-type: none"> <li>1. Cladribine</li> <li>2. Splenectomy</li> <li>3. Cladribine</li> <li>4. HiDICE</li> <li>5. MDMXT/Cytarabine</li> <li>6. Rituximab</li> <li>7. HDMTX/Cytarabine</li> </ol>                                     |
| <b>28</b>  | 5 | <ol style="list-style-type: none"> <li>1. Cladribine</li> <li>2. Cladribine + rituximab</li> <li>3. Rituximab</li> <li>4. Bendamustine + rituximab</li> <li>5. Pentostatin + rituximab</li> </ol>                                                     |
| <b>29*</b> | 5 | <ol style="list-style-type: none"> <li>1. Rituximab</li> <li>2. R-CVP</li> <li>3. Cladribine</li> <li>4. Pentostatin + rituximab</li> </ol>                                                                                                           |

|           |   |                                                                                                                                             |
|-----------|---|---------------------------------------------------------------------------------------------------------------------------------------------|
|           |   | 5. Vemurafenib                                                                                                                              |
| <b>30</b> | 2 | 1. Cladribine<br>2. Cladribine                                                                                                              |
| <b>31</b> | 6 | 1. Cladribine<br>2. Rituximab<br>3. Pentostatin<br>4. Pentostatin<br>5. Bendamustine + rituximab<br>6. Pentostatin + rituximab              |
| <b>32</b> | 5 | 1. Cladribine<br>2. Cladribine<br>3. Cladribine<br>4. Vemurafenib<br>5. Moxetumomab pasudotox                                               |
| <b>33</b> | 5 | 1. Cladribine<br>2. Cladribine<br>3. BL22 immunotoxin<br>4. Rituximab<br>5. LMB-2                                                           |
| <b>34</b> | 2 | 1. Cladribine<br>2. Cladribine + rituximab                                                                                                  |
| <b>35</b> | 7 | 1. Interferon<br>2. Pentostatin<br>3. Cladribine<br>4. Cladribine<br>5. Cladribine + rituximab<br>6. Cladribine<br>7. Moxetumomab pasudotox |
| <b>36</b> | 4 | 1. Cladribine<br>2. Cladribine<br>3. Rituximab<br>4. Rituximab                                                                              |
| <b>37</b> | 3 | 1. Cladribine<br>2. Cladribine<br>3. Cyclophosphamide + rituximab                                                                           |
| <b>39</b> | 5 | 1. Cladribine<br>2. Rituximab<br>3. Rituximab<br>4. Rituximab<br>5. Cladribine                                                              |

\*Patient had splenectomy for spleen rupture due to trauma and not as a therapy.  
Note that there is no subject 24 or 38 due to patients who were found to be ineligible at screening and received a study number but did not start study treatment.

**Table S3. Ibrutinib Dose and Exposure**

| <b>Subject Number</b> | <b>Cycles at 420mg</b> | <b>Cycles at 840mg</b> | <b>Total Cycles</b> |
|-----------------------|------------------------|------------------------|---------------------|
| 1                     | 22                     | 0                      | 22                  |
| 2                     | 46                     | 0                      | 46                  |
| 3                     | 67                     | 0                      | 67                  |
| 4                     | 12                     | 0                      | 12                  |
| 5                     | 8                      | 0                      | 8                   |
| 6                     | 76                     | 0                      | 76                  |
| 7                     | 73                     | 0                      | 73                  |
| 8                     | 73                     | 0                      | 73                  |
| 9                     | 28                     | 0                      | 28                  |
| 10                    | 7                      | 0                      | 7                   |
| 11                    | 65                     | 0                      | 65                  |
| 12                    | 68                     | 0                      | 68                  |
| 13                    | 62                     | 0                      | 69*                 |
| 14                    | 15                     | 24                     | 39                  |
| 15                    | 24                     | 15                     | 39                  |
| 16                    | 18                     | 28                     | 46                  |
| 17                    | 58                     | 7                      | 65                  |
| 18                    | 7                      | 24                     | 31                  |
| 19                    | 42                     | 22                     | 64                  |
| 20                    | 0                      | 10                     | 10                  |
| 21                    | 0                      | 10                     | 10                  |
| 22                    | 42                     | 19                     | 61                  |
| 23                    | 0                      | 1                      | 1                   |
| 25                    | 0                      | 55                     | 55                  |
| 26                    | 33                     | 24                     | 57                  |
| 27                    | 0                      | 49                     | 49                  |
| 28                    | 9                      | 0                      | 9                   |
| 29                    | 32                     | 0                      | 32                  |
| 30                    | 49                     | 0                      | 49                  |

|                       |                    |                  |              |
|-----------------------|--------------------|------------------|--------------|
| 31                    | 11                 | 0                | 11           |
| 32                    | 4                  | 0                | 4            |
| 33                    | 40                 | 0                | 40           |
| 34                    | 13                 | 0                | 13           |
| 35                    | 1                  | 0                | 1            |
| 36                    | 28                 | 0                | 28           |
| 37                    | 4                  | 0                | 6*           |
| 39                    | 10                 | 0                | 10           |
| <i>Total Received</i> | <i>1,047 (78%)</i> | <i>288 (21%)</i> | <i>1,344</i> |

Cycle length is 28 days. Data as of 9/9/2019. \*Additional cycles were at 140mg. Note that there is no subject 24 or 38 due to patients who were found to be ineligible at screening and received a study number but did not start study treatment.

**Table S4. Reason for Study Discontinuation**

| <b>Subject</b>                              | <b>Reason for Discontinuation</b>                           | <b>Days on Study</b> | <b>Days on Treatment</b> |
|---------------------------------------------|-------------------------------------------------------------|----------------------|--------------------------|
| 1                                           | Progressive Disease                                         | 623                  | 609                      |
| 2                                           | Progressive Disease                                         | 1290                 | 1282                     |
| 3                                           | Elective withdrawal (no longer able to attend study visits) | 1996                 | 1996                     |
| 4                                           | Progressive Disease                                         | 357                  | 336                      |
| 5                                           | Progressive Disease                                         | 252                  | 252                      |
| 9                                           | Elective withdrawal                                         | 2040*                | 897                      |
| 10                                          | Adverse Event: Neutropenia                                  | 1443                 | 202                      |
| 11                                          | Progressive Disease                                         | 1887                 | 1884                     |
| 14                                          | Elective withdrawal                                         | 1094                 | 1094                     |
| 15                                          | Adverse Event: palpitations                                 | 1099                 | 1092                     |
| 16                                          | Elective withdrawal                                         | 1942*                | 1282                     |
| 18                                          | Adverse Event: Colon Cancer                                 | 1924*                | 916                      |
| 20                                          | Adverse Event: Decreased cardiac function                   | 337                  | 293                      |
| 21                                          | Death: Pneumonia                                            | 287                  | 284                      |
| 23                                          | Death: Pneumonia                                            | 15                   | 15                       |
| 28                                          | Progressive Disease                                         | 352                  | 243                      |
| 29                                          | Progressive Disease                                         | 899                  | 892                      |
| 31                                          | Progressive Disease                                         | 837                  | 281                      |
| 32                                          | Progressive Disease                                         | 213                  | 101                      |
| 34                                          | Adverse Event: Thrombocytopenia and neutropenia             | 641                  | 420                      |
| 35                                          | Adverse Event: Allergy to ibrutinib                         | 203                  | 22                       |
| 37                                          | Adverse Event: Persistent cytopenias                        | 165                  | 165                      |
| *Patient still on follow-up as of 9/9/2019. |                                                             |                      |                          |

**Table S5: Response to Ibrutinib**

| <b>Response</b>                                                                                                                                      | <b>32-weeks<br/>(Cycle 8)<br/>(n=37)</b> | <b>48-weeks<br/>(Cycle 12)<br/>(n=36*)</b> | <b>Best<br/>Response<br/>Any Cycle<br/>(n=37)</b> |
|------------------------------------------------------------------------------------------------------------------------------------------------------|------------------------------------------|--------------------------------------------|---------------------------------------------------|
| Complete Response                                                                                                                                    | 1 (2.7%)                                 | 4 (11.1%)                                  | 7 (18.9%)                                         |
| Partial Response                                                                                                                                     | 8 (21.6%)                                | 9 (25.0%)                                  | 13 (35.1%)                                        |
| Stable Disease                                                                                                                                       | 21 (56.8%)                               | 11 (30.6%)                                 | 10 (27.0%)                                        |
| Progressive Disease                                                                                                                                  | 3 (8.1%)                                 | 6 (16.7%)                                  | 3 (8.1%)                                          |
| Death Before Assessment                                                                                                                              | 1 (2.7%)                                 | 2 (5.6%)                                   | 1 (2.7%)                                          |
| No Response, Off Treatment                                                                                                                           | 3 (8.1%)                                 | 4 (11.1%)                                  | 3 (8.1%)                                          |
| <b>Overall Response Rate, n (%)</b>                                                                                                                  | <b>9/37 (24.3%)</b>                      | <b>13/36 (36.1%)</b>                       | <b>20/37 (54.1%)</b>                              |
| *Patient 39 is on treatment but has not reached the 48-week assessment and is included in the 32-week assessment and best response any cycle totals. |                                          |                                            |                                                   |



**Table S6: Responses by Histologic Subtype**

| Assessment                                                                                                                                           | Response                                  | Histology                            |                                    | p           |
|------------------------------------------------------------------------------------------------------------------------------------------------------|-------------------------------------------|--------------------------------------|------------------------------------|-------------|
|                                                                                                                                                      |                                           | Classic<br>(n=28*)                   | Variant<br>(n=9)                   |             |
| <b>32 Weeks<br/>(Cycle 8)</b>                                                                                                                        | Complete Response                         | 1                                    | 0                                  | -           |
|                                                                                                                                                      | Partial Response                          | 6                                    | 2                                  | -           |
|                                                                                                                                                      | <b>Overall Response Rate<br/>(95% CI)</b> | <b>7/28, 25.0%</b><br>(10.7%-44.9%)  | <b>2/9, 22.2%</b><br>(2.8%-60.0%)  | <b>1.0</b>  |
| <b>48 Weeks<br/>(Cycle 12)</b>                                                                                                                       | Complete Response                         | 4                                    | 0                                  | -           |
|                                                                                                                                                      | Partial Response                          | 7                                    | 2                                  | -           |
|                                                                                                                                                      | <b>Overall Response Rate<br/>(95% CI)</b> | <b>11/27, 40.7%</b><br>(22.4%-61.2%) | <b>2/9, 22.2%</b><br>(2.8%-60.0%)  | <b>0.44</b> |
| <b>Best<br/>Response at<br/>Any Time</b>                                                                                                             | Complete Response                         | 6                                    | 1                                  | -           |
|                                                                                                                                                      | Partial Response                          | 9                                    | 4                                  | -           |
|                                                                                                                                                      | <b>Overall Response Rate<br/>(95% CI)</b> | <b>15/28, 53.6%</b><br>(33.9%-72.5%) | <b>5/9, 55.6%</b><br>(21.2%-86.3%) | <b>1.0</b>  |
| *Patient 39 is on treatment but has not reached the 48-week assessment and is included in the 32-week assessment and best response any cycle totals. |                                           |                                      |                                    |             |

**Table S7: Univariate Associations Between Patient Characteristics and Outcome**

| <b>Variable</b>                | <b>Level</b>         | <b>Odds ratio for response (95% CI)</b> | <b>PFS hazard ratio (95% CI)</b> |
|--------------------------------|----------------------|-----------------------------------------|----------------------------------|
| <b>Sex</b>                     | Male                 | Ref                                     | Ref                              |
|                                | Female               | 0.57 (0.11-3.02)                        | 1.20 (0.26-5.67)                 |
| <b>Age (continuous)</b>        | 1-year increase      | 0.90 (0.84-0.98)                        | 1.05 (0.99-1.12)                 |
| <b>Age (binary)</b>            | <65 years            | Ref                                     | Ref                              |
|                                | 65+ years            | 0.47 (0.13-1.74)                        | 2.26 (0.58-8.75)                 |
| <b>Histology</b>               | Classic              | 0.92 (0.20-4.18)                        | 0.90 (0.23-3.49)                 |
|                                | Variant              | Ref                                     | Ref                              |
| <b><i>BRAF</i> status</b>      | Normal               | Ref                                     | Ref                              |
|                                | Mutated              | 1.22 (0.33-4.57)                        | 0.91 (0.26-3.16)                 |
| <b>Splenectomy</b>             | No                   | Ref                                     | Ref                              |
|                                | Yes                  | 0.99 (0.26-3.82)                        | 2.56 (0.72-9.07)                 |
| <b>Prior treatments (con.)</b> | 1-treatment increase | 0.80 (0.61-1.04)                        | 1.11 (0.92-1.35)                 |
| <b>Prior treatments</b>        | 0-1                  | Ref                                     | Ref                              |
|                                | 2+                   | 0.19 (0.02-1.80)                        | 2.28 (0.29-18.03)                |

**Table S8: Frequency of Treatment-Related Adverse Events**

| Toxicity Type                        | Dose Level | Grade 1-2 |     | Grade 3+ |    | Any |     |
|--------------------------------------|------------|-----------|-----|----------|----|-----|-----|
|                                      |            | n         | %   | n        | %  | n   | %   |
| Abdominal pain                       | 420mg      | 2         | 8%  | 0        | 0% | 2   | 8%  |
|                                      | All        | 2         | 5%  | 0        | 0% | 2   | 5%  |
| Alanine aminotransferase increased   | 420mg      | 3         | 13% | 0        | 0% | 3   | 13% |
|                                      | All        | 3         | 8%  | 0        | 0% | 3   | 8%  |
| Alkaline phosphatase increased       | 420mg      | 4         | 17% | 0        | 0% | 4   | 17% |
|                                      | All        | 4         | 11% | 0        | 0% | 4   | 11% |
| Allergic reaction                    | 840mg      | 1         | 8%  | 0        | 0% | 1   | 8%  |
|                                      | All        | 1         | 3%  | 0        | 0% | 1   | 3%  |
| Allergic rhinitis                    | 840mg      | 1         | 8%  | 0        | 0% | 1   | 8%  |
|                                      | All        | 1         | 3%  | 0        | 0% | 1   | 3%  |
| Alopecia                             | 840mg      | 2         | 15% | 0        | 0% | 2   | 15% |
|                                      | All        | 2         | 5%  | 0        | 0% | 2   | 5%  |
| Anemia                               | 420mg      | 7         | 29% | 0        | 0% | 7   | 29% |
|                                      | 840mg      | 1         | 8%  | 1        | 8% | 2   | 15% |
|                                      | All        | 8         | 22% | 1        | 3% | 9   | 24% |
| Anorexia                             | 840mg      | 1         | 8%  | 0        | 0% | 1   | 8%  |
|                                      | All        | 1         | 3%  | 0        | 0% | 1   | 3%  |
| Arthralgia                           | 420mg      | 6         | 25% | 0        | 0% | 6   | 25% |
|                                      | All        | 6         | 16% | 0        | 0% | 6   | 16% |
| Aspartate aminotransferase increased | 420mg      | 3         | 13% | 0        | 0% | 3   | 13% |
|                                      | All        | 3         | 8%  | 0        | 0% | 3   | 8%  |
| Atrial fibrillation                  | 420mg      | 2         | 8%  | 0        | 0% | 2   | 8%  |
|                                      | 840mg      | 4         | 31% | 0        | 0% | 4   | 31% |
|                                      | All        | 6         | 16% | 0        | 0% | 6   | 16% |
| Atrial flutter                       | 420mg      | 0         | 0%  | 1        | 4% | 1   | 4%  |
|                                      | 840mg      | 1         | 8%  | 0        | 0% | 1   | 8%  |
|                                      | All        | 1         | 3%  | 1        | 3% | 2   | 5%  |
| Back pain                            | 420mg      | 1         | 4%  | 0        | 0% | 1   | 4%  |

| Toxicity Type                                            | Dose Level | Grade 1-2 |     | Grade 3+ |    | Any |     |
|----------------------------------------------------------|------------|-----------|-----|----------|----|-----|-----|
|                                                          |            | n         | %   | n        | %  | n   | %   |
|                                                          | All        | 1         | 3%  | 0        | 0% | 1   | 3%  |
| Bladder infection                                        | 420mg      | 1         | 4%  | 0        | 0% | 1   | 4%  |
|                                                          | All        | 1         | 3%  | 0        | 0% | 1   | 3%  |
| Bloating                                                 | 420mg      | 2         | 8%  | 0        | 0% | 2   | 8%  |
|                                                          | All        | 2         | 5%  | 0        | 0% | 2   | 5%  |
| Blood bilirubin increased                                | 420mg      | 1         | 4%  | 0        | 0% | 1   | 4%  |
|                                                          | 840mg      | 1         | 8%  | 0        | 0% | 1   | 8%  |
|                                                          | All        | 2         | 5%  | 0        | 0% | 2   | 5%  |
| Blurred vision                                           | 420mg      | 2         | 8%  | 0        | 0% | 2   | 8%  |
|                                                          | All        | 2         | 5%  | 0        | 0% | 2   | 5%  |
| Bronchial infection                                      | 420mg      | 1         | 4%  | 0        | 0% | 1   | 4%  |
|                                                          | All        | 1         | 3%  | 0        | 0% | 1   | 3%  |
| Bruising                                                 | 420mg      | 6         | 25% | 0        | 0% | 6   | 25% |
|                                                          | 840mg      | 4         | 31% | 0        | 0% | 4   | 31% |
|                                                          | All        | 10        | 27% | 0        | 0% | 10  | 27% |
| Bullous dermatitis                                       | 420mg      | 1         | 4%  | 0        | 0% | 1   | 4%  |
|                                                          | 840mg      | 2         | 15% | 0        | 0% | 2   | 15% |
|                                                          | All        | 3         | 8%  | 0        | 0% | 3   | 8%  |
| Cardiac disorders - Other, specify:<br>Chest Heaviness   | 840mg      | 1         | 8%  | 0        | 0% | 1   | 8%  |
|                                                          | All        | 1         | 3%  | 0        | 0% | 1   | 3%  |
| Cardiac disorders - Other, specify:<br>"Heart Whooshing" | 840mg      | 1         | 8%  | 0        | 0% | 1   | 8%  |
|                                                          | All        | 1         | 3%  | 0        | 0% | 1   | 3%  |
| Chest pain - cardiac                                     | 420mg      | 1         | 4%  | 0        | 0% | 1   | 4%  |
|                                                          | All        | 1         | 3%  | 0        | 0% | 1   | 3%  |
| Chills                                                   | 420mg      | 2         | 8%  | 0        | 0% | 2   | 8%  |
|                                                          | All        | 2         | 5%  | 0        | 0% | 2   | 5%  |
| Confusion                                                | 840mg      | 1         | 8%  | 0        | 0% | 1   | 8%  |
|                                                          | All        | 1         | 3%  | 0        | 0% | 1   | 3%  |
| Constipation                                             | 420mg      | 2         | 8%  | 0        | 0% | 2   | 8%  |
|                                                          | 840mg      | 1         | 8%  | 0        | 0% | 1   | 8%  |

| Toxicity Type               | Dose Level | Grade 1-2 |     | Grade 3+ |    | Any |     |
|-----------------------------|------------|-----------|-----|----------|----|-----|-----|
|                             |            | n         | %   | n        | %  | n   | %   |
|                             | All        | 3         | 8%  | 0        | 0% | 3   | 8%  |
| Cough                       | 840mg      | 1         | 8%  | 0        | 0% | 1   | 8%  |
|                             | All        | 1         | 3%  | 0        | 0% | 1   | 3%  |
| Creatinine increased        | 420mg      | 2         | 8%  | 0        | 0% | 2   | 8%  |
|                             | All        | 2         | 5%  | 0        | 0% | 2   | 5%  |
| Dehydration                 | 840mg      | 1         | 8%  | 0        | 0% | 1   | 8%  |
|                             | All        | 1         | 3%  | 0        | 0% | 1   | 3%  |
| Diarrhea                    | 420mg      | 10        | 42% | 0        | 0% | 10  | 42% |
|                             | 840mg      | 5         | 38% | 0        | 0% | 5   | 38% |
|                             | All        | 15        | 41% | 0        | 0% | 15  | 41% |
| Dizziness                   | 420mg      | 4         | 17% | 0        | 0% | 4   | 17% |
|                             | 840mg      | 1         | 8%  | 0        | 0% | 1   | 8%  |
|                             | All        | 5         | 14% | 0        | 0% | 5   | 14% |
| Dry mouth                   | 420mg      | 2         | 8%  | 0        | 0% | 2   | 8%  |
|                             | 840mg      | 2         | 15% | 0        | 0% | 2   | 15% |
|                             | All        | 4         | 11% | 0        | 0% | 4   | 11% |
| Dry skin                    | 420mg      | 1         | 4%  | 0        | 0% | 1   | 4%  |
|                             | 840mg      | 2         | 15% | 0        | 0% | 2   | 15% |
|                             | All        | 3         | 8%  | 0        | 0% | 3   | 8%  |
| Dyspepsia                   | 420mg      | 1         | 4%  | 0        | 0% | 1   | 4%  |
|                             | All        | 1         | 3%  | 0        | 0% | 1   | 3%  |
| Dyspnea                     | 420mg      | 2         | 8%  | 0        | 0% | 2   | 8%  |
|                             | All        | 2         | 5%  | 0        | 0% | 2   | 5%  |
| Ear pain                    | 420mg      | 1         | 4%  | 0        | 0% | 1   | 4%  |
|                             | All        | 1         | 3%  | 0        | 0% | 1   | 3%  |
| Edema limbs                 | 420mg      | 2         | 8%  | 0        | 0% | 2   | 8%  |
|                             | All        | 2         | 5%  | 0        | 0% | 2   | 5%  |
| Ejection fraction decreased | 840mg      | 0         | 0%  | 1        | 8% | 1   | 8%  |
|                             | All        | 0         | 0%  | 1        | 3% | 1   | 3%  |
| Enterocolitis               | 420mg      | 0         | 0%  | 1        | 4% | 1   | 4%  |

| Toxicity Type                                        | Dose Level | Grade 1-2 |     | Grade 3+ |    | Any |     |
|------------------------------------------------------|------------|-----------|-----|----------|----|-----|-----|
|                                                      |            | n         | %   | n        | %  | n   | %   |
|                                                      | All        | 0         | 0%  | 1        | 3% | 1   | 3%  |
| Epistaxis                                            | 420mg      | 1         | 4%  | 0        | 0% | 1   | 4%  |
|                                                      | 840mg      | 2         | 15% | 0        | 0% | 2   | 15% |
|                                                      | All        | 3         | 8%  | 0        | 0% | 3   | 8%  |
| Erythema multiforme                                  | 420mg      | 3         | 13% | 0        | 0% | 3   | 13% |
|                                                      | All        | 3         | 8%  | 0        | 0% | 3   | 8%  |
| Eye disorders - Other, specify:<br>Watery Itchy Eyes | 420mg      | 1         | 4%  | 0        | 0% | 1   | 4%  |
|                                                      | All        | 1         | 3%  | 0        | 0% | 1   | 3%  |
| Eye disorders - Other, specify:<br>Right Eye Redness | 420mg      | 1         | 4%  | 0        | 0% | 1   | 4%  |
|                                                      | All        | 1         | 3%  | 0        | 0% | 1   | 3%  |
| Fall                                                 | 420mg      | 1         | 4%  | 0        | 0% | 1   | 4%  |
|                                                      | All        | 1         | 3%  | 0        | 0% | 1   | 3%  |
| Fatigue                                              | 420mg      | 9         | 38% | 0        | 0% | 9   | 38% |
|                                                      | 840mg      | 2         | 15% | 0        | 0% | 2   | 15% |
|                                                      | All        | 11        | 30% | 0        | 0% | 11  | 30% |
| Febrile neutropenia                                  | 420mg      | 0         | 0%  | 2        | 8% | 2   | 8%  |
|                                                      | All        | 0         | 0%  | 2        | 5% | 2   | 5%  |
| Fever                                                | 420mg      | 1         | 4%  | 0        | 0% | 1   | 4%  |
|                                                      | 840mg      | 1         | 8%  | 0        | 0% | 1   | 8%  |
|                                                      | All        | 2         | 5%  | 0        | 0% | 2   | 5%  |
| Gastroesophageal reflux disease                      | 420mg      | 3         | 13% | 0        | 0% | 3   | 13% |
|                                                      | 840mg      | 1         | 8%  | 0        | 0% | 1   | 8%  |
|                                                      | All        | 4         | 11% | 0        | 0% | 4   | 11% |
| Generalized muscle weakness                          | 840mg      | 1         | 8%  | 0        | 0% | 1   | 8%  |
|                                                      | All        | 1         | 3%  | 0        | 0% | 1   | 3%  |
| Hair texture abnormal                                | 420mg      | 1         | 4%  | 0        | 0% | 1   | 4%  |
|                                                      | All        | 1         | 3%  | 0        | 0% | 1   | 3%  |
| Headache                                             | 420mg      | 2         | 8%  | 0        | 0% | 2   | 8%  |
|                                                      | All        | 2         | 5%  | 0        | 0% | 2   | 5%  |
| Heart failure                                        | 840mg      | 0         | 0%  | 1        | 8% | 1   | 8%  |

| Toxicity Type                                          | Dose Level | Grade 1-2 |     | Grade 3+ |     | Any |     |
|--------------------------------------------------------|------------|-----------|-----|----------|-----|-----|-----|
|                                                        |            | n         | %   | n        | %   | n   | %   |
|                                                        | All        | 0         | 0%  | 1        | 3%  | 1   | 3%  |
| Hematuria                                              | 420mg      | 1         | 4%  | 0        | 0%  | 1   | 4%  |
|                                                        | All        | 1         | 3%  | 0        | 0%  | 1   | 3%  |
| Hyperglycemia                                          | 420mg      | 2         | 8%  | 0        | 0%  | 2   | 8%  |
|                                                        | All        | 2         | 5%  | 0        | 0%  | 2   | 5%  |
| Hyperhidrosis                                          | 420mg      | 1         | 4%  | 0        | 0%  | 1   | 4%  |
|                                                        | 840mg      | 1         | 8%  | 0        | 0%  | 1   | 8%  |
|                                                        | All        | 2         | 5%  | 0        | 0%  | 2   | 5%  |
| Hypertension                                           | 420mg      | 4         | 17% | 0        | 0%  | 4   | 17% |
|                                                        | 840mg      | 2         | 15% | 2        | 15% | 4   | 31% |
|                                                        | All        | 6         | 16% | 2        | 5%  | 8   | 22% |
| Hyperuricemia                                          | 420mg      | 2         | 8%  | 0        | 0%  | 2   | 8%  |
|                                                        | 840mg      | 3         | 23% | 0        | 0%  | 3   | 23% |
|                                                        | All        | 5         | 14% | 0        | 0%  | 5   | 14% |
| Hypoalbuminemia                                        | 840mg      | 1         | 8%  | 0        | 0%  | 1   | 8%  |
|                                                        | All        | 1         | 3%  | 0        | 0%  | 1   | 3%  |
| Hypocalcemia                                           | 840mg      | 2         | 15% | 0        | 0%  | 2   | 15% |
|                                                        | All        | 2         | 5%  | 0        | 0%  | 2   | 5%  |
| Hypokalemia                                            | 840mg      | 1         | 8%  | 0        | 0%  | 1   | 8%  |
|                                                        | All        | 1         | 3%  | 0        | 0%  | 1   | 3%  |
| Hypophosphatemia                                       | 420mg      | 0         | 0%  | 1        | 4%  | 1   | 4%  |
|                                                        | All        | 0         | 0%  | 1        | 3%  | 1   | 3%  |
| Infections and infestations - Other, specify: Shingles | 420mg      | 1         | 4%  | 0        | 0%  | 1   | 4%  |
|                                                        | All        | 1         | 3%  | 0        | 0%  | 1   | 3%  |
| Left ventricular systolic dysfunction                  | 840mg      | 0         | 0%  | 1        | 8%  | 1   | 8%  |
|                                                        | All        | 0         | 0%  | 1        | 3%  | 1   | 3%  |
| Leukocytosis                                           | 420mg      | 0         | 0%  | 1        | 4%  | 1   | 4%  |
|                                                        | All        | 0         | 0%  | 1        | 3%  | 1   | 3%  |
| Lung infection                                         | 420mg      | 0         | 0%  | 1        | 4%  | 1   | 4%  |
|                                                        | 840mg      | 0         | 0%  | 1        | 8%  | 1   | 8%  |

| Toxicity Type                                                                                                             | Dose Level | Grade 1-2 |     | Grade 3+ |     | Any |     |
|---------------------------------------------------------------------------------------------------------------------------|------------|-----------|-----|----------|-----|-----|-----|
|                                                                                                                           |            | n         | %   | n        | %   | n   | %   |
|                                                                                                                           | All        | 0         | 0%  | 2        | 5%  | 2   | 5%  |
| Lymphocyte count decreased                                                                                                | 420mg      | 1         | 4%  | 5        | 21% | 6   | 25% |
|                                                                                                                           | 840mg      | 4         | 31% | 1        | 8%  | 5   | 38% |
|                                                                                                                           | All        | 5         | 14% | 6        | 16% | 11  | 30% |
| Lymphocyte count increased                                                                                                | 420mg      | 0         | 0%  | 1        | 4%  | 1   | 4%  |
|                                                                                                                           | All        | 0         | 0%  | 1        | 3%  | 1   | 3%  |
| Menorrhagia                                                                                                               | 840mg      | 1         | 8%  | 0        | 0%  | 1   | 8%  |
|                                                                                                                           | All        | 1         | 3%  | 0        | 0%  | 1   | 3%  |
| Mucositis oral                                                                                                            | 420mg      | 5         | 21% | 0        | 0%  | 5   | 21% |
|                                                                                                                           | 840mg      | 2         | 15% | 0        | 0%  | 2   | 15% |
|                                                                                                                           | All        | 7         | 19% | 0        | 0%  | 7   | 19% |
| Muscle cramp                                                                                                              | 420mg      | 2         | 8%  | 0        | 0%  | 2   | 8%  |
|                                                                                                                           | All        | 2         | 5%  | 0        | 0%  | 2   | 5%  |
| Myalgia                                                                                                                   | 420mg      | 9         | 38% | 0        | 0%  | 9   | 38% |
|                                                                                                                           | 840mg      | 5         | 38% | 0        | 0%  | 5   | 38% |
|                                                                                                                           | All        | 14        | 38% | 0        | 0%  | 14  | 38% |
| Nail changes                                                                                                              | 420mg      | 1         | 4%  | 0        | 0%  | 1   | 4%  |
|                                                                                                                           | All        | 1         | 3%  | 0        | 0%  | 1   | 3%  |
| Nausea                                                                                                                    | 420mg      | 5         | 21% | 0        | 0%  | 5   | 21% |
|                                                                                                                           | 840mg      | 7         | 54% | 0        | 0%  | 7   | 54% |
|                                                                                                                           | All        | 12        | 32% | 0        | 0%  | 12  | 32% |
| Neoplasms benign, malignant and unspecified (incl cysts and polyps) - Other, specify: basal cell carcinoma of the skin    | 840mg      | 1         | 8%  | 0        | 0%  | 1   | 8%  |
|                                                                                                                           | All        | 1         | 3%  | 0        | 0%  | 1   | 3%  |
| Neoplasms benign, malignant and unspecified (incl cysts and polyps) - Other, specify: squamous cell carcinoma of the skin | 840mg      | 1         | 8%  | 0        | 0%  | 1   | 8%  |
|                                                                                                                           | All        | 1         | 3%  | 0        | 0%  | 1   | 3%  |
| Neoplasms benign, malignant and unspecified (incl cysts and polyps) - Other, specify: polyp                               | 840mg      | 1         | 8%  | 0        | 0%  | 1   | 8%  |
|                                                                                                                           | All        | 1         | 3%  | 0        | 0%  | 1   | 3%  |



| Toxicity Type              | Dose Level | Grade 1-2 |     | Grade 3+ |     | Any |     |
|----------------------------|------------|-----------|-----|----------|-----|-----|-----|
|                            |            | n         | %   | n        | %   | n   | %   |
| Neutrophil count decreased | 420mg      | 0         | 0%  | 6        | 25% | 6   | 25% |
|                            | 840mg      | 1         | 8%  | 0        | 0%  | 1   | 8%  |
|                            | All        | 1         | 3%  | 6        | 16% | 7   | 19% |
| Non-cardiac chest pain     | 420mg      | 1         | 4%  | 0        | 0%  | 1   | 4%  |
|                            | All        | 1         | 3%  | 0        | 0%  | 1   | 3%  |
| Oral hemorrhage            | 840mg      | 1         | 8%  | 0        | 0%  | 1   | 8%  |
|                            | All        | 1         | 3%  | 0        | 0%  | 1   | 3%  |
| Oral pain                  | 420mg      | 1         | 4%  | 0        | 0%  | 1   | 4%  |
|                            | All        | 1         | 3%  | 0        | 0%  | 1   | 3%  |
| Pain                       | 420mg      | 4         | 17% | 0        | 0%  | 4   | 17% |
|                            | All        | 4         | 11% | 0        | 0%  | 4   | 11% |
| Pain in extremity          | 420mg      | 1         | 4%  | 0        | 0%  | 1   | 4%  |
|                            | 840mg      | 1         | 8%  | 0        | 0%  | 1   | 8%  |
|                            | All        | 2         | 5%  | 0        | 0%  | 2   | 5%  |
| Palpitations               | 420mg      | 2         | 8%  | 0        | 0%  | 2   | 8%  |
|                            | 840mg      | 2         | 15% | 0        | 0%  | 2   | 15% |
|                            | All        | 4         | 11% | 0        | 0%  | 4   | 11% |
| Paresthesia                | 420mg      | 3         | 13% | 0        | 0%  | 3   | 13% |
|                            | 840mg      | 2         | 15% | 0        | 0%  | 2   | 15% |
|                            | All        | 5         | 14% | 0        | 0%  | 5   | 14% |
| Photosensitivity           | 420mg      | 1         | 4%  | 0        | 0%  | 1   | 4%  |
|                            | All        | 1         | 3%  | 0        | 0%  | 1   | 3%  |
| Platelet count decreased   | 420mg      | 3         | 13% | 6        | 25% | 9   | 38% |
|                            | 840mg      | 1         | 8%  | 0        | 0%  | 1   | 8%  |
|                            | All        | 4         | 11% | 6        | 16% | 10  | 27% |
| Pruritus                   | 840mg      | 1         | 8%  | 0        | 0%  | 1   | 8%  |
|                            | All        | 1         | 3%  | 0        | 0%  | 1   | 3%  |
| Rash acneiform             | 420mg      | 2         | 8%  | 0        | 0%  | 2   | 8%  |
|                            | All        | 2         | 5%  | 0        | 0%  | 2   | 5%  |
| Rash maculo-papular        | 420mg      | 6         | 25% | 1        | 4%  | 7   | 29% |

| Toxicity Type                                                                    | Dose Level | Grade 1-2 |     | Grade 3+ |    | Any |     |
|----------------------------------------------------------------------------------|------------|-----------|-----|----------|----|-----|-----|
|                                                                                  |            | n         | %   | n        | %  | n   | %   |
|                                                                                  | 840mg      | 4         | 31% | 0        | 0% | 4   | 31% |
|                                                                                  | All        | 10        | 27% | 1        | 3% | 11  | 30% |
| Rhinitis infective                                                               | 420mg      | 1         | 4%  | 0        | 0% | 1   | 4%  |
|                                                                                  | All        | 1         | 3%  | 0        | 0% | 1   | 3%  |
| Sepsis                                                                           | 420mg      | 0         | 0%  | 1        | 4% | 1   | 4%  |
|                                                                                  | All        | 0         | 0%  | 1        | 3% | 1   | 3%  |
| Shingles                                                                         | 420mg      | 1         | 4%  | 0        | 0% | 1   | 4%  |
|                                                                                  | All        | 1         | 3%  | 0        | 0% | 1   | 3%  |
| Sinus bradycardia                                                                | 420mg      | 3         | 13% | 0        | 0% | 3   | 13% |
|                                                                                  | All        | 3         | 8%  | 0        | 0% | 3   | 8%  |
| Sinus tachycardia                                                                | 420mg      | 1         | 4%  | 0        | 0% | 1   | 4%  |
|                                                                                  | All        | 1         | 3%  | 0        | 0% | 1   | 3%  |
| Sinusitis                                                                        | 840mg      | 1         | 8%  | 0        | 0% | 1   | 8%  |
|                                                                                  | All        | 1         | 3%  | 0        | 0% | 1   | 3%  |
| Skin and subcutaneous tissue disorders - Other, specify: follicular rash - scalp | 420mg      | 1         | 4%  | 0        | 0% | 1   | 4%  |
|                                                                                  | Any        | 1         | 3%  | 0        | 0% | 1   | 3%  |
| Skin and subcutaneous tissue disorders - Other, specify: rosacea                 | 420mg      | 1         | 4%  | 0        | 0% | 1   | 4%  |
|                                                                                  | Any        | 1         | 3%  | 0        | 0% | 1   | 3%  |
| Skin and subcutaneous tissue disorders - Other, specify: panniculitis            | 420mg      | 1         | 4%  | 0        | 0% | 1   | 4%  |
|                                                                                  | Any        | 1         | 3%  | 0        | 0% | 1   | 3%  |
| Skin and subcutaneous tissue disorders - Other, specify: blood blister           | 420mg      | 1         | 4%  | 0        | 0% | 1   | 4%  |
|                                                                                  | Any        | 1         | 3%  | 0        | 0% | 1   | 3%  |
| Skin and subcutaneous tissue disorders - Other, specify: precancerous lesions    | 840mg      | 1         | 8%  | 0        | 0% | 1   | 8%  |
|                                                                                  | Any        | 1         | 3%  | 0        | 0% | 1   | 3%  |
| Skin and subcutaneous tissue disorders - Other, specify: brittle nails           | 420mg      | 1         | 4%  | 0        | 0% | 1   | 4%  |
|                                                                                  | 840mg      | 1         | 8%  | 0        | 0% | 1   | 8%  |
|                                                                                  | Any        | 2         | 6%  | 0        | 0% | 2   | 6%  |
| Skin infection                                                                   | 420mg      | 1         | 4%  | 1        | 4% | 2   | 8%  |

| Toxicity Type               | Dose Level | Grade 1-2 |     | Grade 3+ |     | Any |     |
|-----------------------------|------------|-----------|-----|----------|-----|-----|-----|
|                             |            | n         | %   | n        | %   | n   | %   |
|                             | All        | 1         | 3%  | 1        | 3%  | 2   | 5%  |
| Stomach pain                | 420mg      | 1         | 4%  | 0        | 0%  | 1   | 4%  |
|                             | 840mg      | 1         | 8%  | 0        | 0%  | 1   | 8%  |
|                             | All        | 2         | 5%  | 0        | 0%  | 2   | 5%  |
| Upper respiratory infection | 420mg      | 0         | 0%  | 1        | 4%  | 1   | 4%  |
|                             | 840mg      | 1         | 8%  | 0        | 0%  | 1   | 8%  |
|                             | All        | 1         | 3%  | 1        | 3%  | 2   | 5%  |
| Urinary tract infection     | 840mg      | 1         | 8%  | 1        | 8%  | 2   | 15% |
|                             | All        | 1         | 3%  | 1        | 3%  | 2   | 5%  |
| Urinary tract pain          | 840mg      | 1         | 8%  | 0        | 0%  | 1   | 8%  |
|                             | All        | 1         | 3%  | 0        | 0%  | 1   | 3%  |
| Urticaria                   | 840mg      | 1         | 8%  | 0        | 0%  | 1   | 8%  |
|                             | All        | 1         | 3%  | 0        | 0%  | 1   | 3%  |
| Uveitis                     | 420mg      | 1         | 4%  | 0        | 0%  | 1   | 4%  |
|                             | All        | 1         | 3%  | 0        | 0%  | 1   | 3%  |
| Ventricular arrhythmia      | 420mg      | 1         | 4%  | 0        | 0%  | 1   | 4%  |
|                             | All        | 1         | 3%  | 0        | 0%  | 1   | 3%  |
| Vomiting                    | 420mg      | 1         | 4%  | 0        | 0%  | 1   | 4%  |
|                             | All        | 1         | 3%  | 0        | 0%  | 1   | 3%  |
| Weight gain                 | 420mg      | 3         | 13% | 0        | 0%  | 3   | 13% |
|                             | All        | 3         | 8%  | 0        | 0%  | 3   | 8%  |
| Weight loss                 | 420mg      | 1         | 4%  | 0        | 0%  | 1   | 4%  |
|                             | All        | 1         | 3%  | 0        | 0%  | 1   | 3%  |
| White blood cell decreased  | 420mg      | 3         | 13% | 3        | 13% | 6   | 25% |
|                             | 840mg      | 2         | 15% | 0        | 0%  | 2   | 15% |
|                             | All        | 5         | 14% | 3        | 8%  | 8   | 22% |

**Table S9: Frequency of All Adverse Events (n=37 patients)**

| Toxicity Type                                   | Dose Level | Grade 1-2 |     | Grade ≥3 |    | Any |     |
|-------------------------------------------------|------------|-----------|-----|----------|----|-----|-----|
|                                                 |            | n         | %   | n        | %  | n   | %   |
| Abdominal distension                            | 420mg      | 2         | 8%  | 0        | 0% | 2   | 8%  |
|                                                 | All        | 2         | 5%  | 0        | 0% | 2   | 5%  |
| Abdominal pain                                  | 420mg      | 4         | 17% | 0        | 0% | 4   | 17% |
|                                                 | 840mg      | 3         | 23% | 0        | 0% | 3   | 23% |
|                                                 | All        | 7         | 19% | 0        | 0% | 7   | 19% |
| Activated partial thromboplastin time prolonged | 840mg      | 1         | 8%  | 0        | 0% | 1   | 8%  |
|                                                 | All        | 1         | 3%  | 0        | 0% | 1   | 3%  |
| Alanine aminotransferase increased              | 420mg      | 4         | 17% | 0        | 0% | 4   | 17% |
|                                                 | 840mg      | 2         | 15% | 0        | 0% | 2   | 15% |
|                                                 | All        | 6         | 16% | 0        | 0% | 6   | 16% |
| Alkaline phosphatase increased                  | 420mg      | 6         | 25% | 0        | 0% | 6   | 25% |
|                                                 | 840mg      | 3         | 23% | 0        | 0% | 3   | 23% |
|                                                 | All        | 9         | 24% | 0        | 0% | 9   | 24% |
| Allergic reaction                               | 840mg      | 1         | 8%  | 0        | 0% | 1   | 8%  |
|                                                 | All        | 1         | 3%  | 0        | 0% | 1   | 3%  |
| Allergic rhinitis                               | 420mg      | 4         | 17% | 0        | 0% | 4   | 17% |
|                                                 | 840mg      | 3         | 23% | 0        | 0% | 3   | 23% |
|                                                 | All        | 7         | 19% | 0        | 0% | 7   | 19% |
| Alopecia                                        | 420mg      | 1         | 4%  | 0        | 0% | 1   | 4%  |
|                                                 | 840mg      | 2         | 15% | 0        | 0% | 2   | 15% |
|                                                 | All        | 3         | 8%  | 0        | 0% | 3   | 8%  |
| Anemia                                          | 420mg      | 10        | 42% | 1        | 4% | 11  | 46% |
|                                                 | 840mg      | 4         | 31% | 1        | 8% | 5   | 38% |
|                                                 | All        | 14        | 38% | 2        | 5% | 16  | 43% |
| Anorectal infection                             | 420mg      | 1         | 4%  | 0        | 0% | 1   | 4%  |
|                                                 | All        | 1         | 3%  | 0        | 0% | 1   | 3%  |
| Anorexia                                        | 420mg      | 2         | 8%  | 0        | 0% | 2   | 8%  |
|                                                 | 840mg      | 2         | 15% | 0        | 0% | 2   | 15% |

| Toxicity Type                        | Dose Level | Grade 1-2 |     | Grade ≥3 |    | Any |     |
|--------------------------------------|------------|-----------|-----|----------|----|-----|-----|
|                                      |            | n         | %   | n        | %  | n   | %   |
|                                      | All        | 4         | 11% | 0        | 0% | 4   | 11% |
| Anorgasmia                           | 840mg      | 1         | 8%  | 0        | 0% | 1   | 8%  |
|                                      | All        | 1         | 3%  | 0        | 0% | 1   | 3%  |
| Anxiety                              | 420mg      | 1         | 4%  | 0        | 0% | 1   | 4%  |
|                                      | 840mg      | 2         | 15% | 0        | 0% | 2   | 15% |
|                                      | All        | 3         | 8%  | 0        | 0% | 3   | 8%  |
| Aortic valve disease                 | 840mg      | 0         | 0%  | 1        | 8% | 1   | 8%  |
|                                      | All        | 0         | 0%  | 1        | 3% | 1   | 3%  |
| Arthralgia                           | 420mg      | 10        | 42% | 0        | 0% | 10  | 42% |
|                                      | 840mg      | 4         | 31% | 0        | 0% | 4   | 31% |
|                                      | All        | 14        | 38% | 0        | 0% | 14  | 38% |
| Arthritis                            | 420mg      | 1         | 4%  | 0        | 0% | 1   | 4%  |
|                                      | All        | 1         | 3%  | 0        | 0% | 1   | 3%  |
| Aspartate aminotransferase increased | 420mg      | 3         | 13% | 0        | 0% | 3   | 13% |
|                                      | 840mg      | 5         | 38% | 0        | 0% | 5   | 38% |
|                                      | All        | 8         | 22% | 0        | 0% | 8   | 22% |
| Atrial fibrillation                  | 420mg      | 2         | 8%  | 0        | 0% | 2   | 8%  |
|                                      | 840mg      | 4         | 31% | 0        | 0% | 4   | 31% |
|                                      | All        | 6         | 16% | 0        | 0% | 6   | 16% |
| Atrial flutter                       | 420mg      | 0         | 0%  | 1        | 4% | 1   | 4%  |
|                                      | 840mg      | 1         | 8%  | 0        | 0% | 1   | 8%  |
|                                      | All        | 1         | 3%  | 1        | 3% | 2   | 5%  |
| Back pain                            | 420mg      | 6         | 25% | 0        | 0% | 6   | 25% |
|                                      | 840mg      | 5         | 38% | 0        | 0% | 5   | 38% |
|                                      | All        | 11        | 30% | 0        | 0% | 11  | 30% |
| Bladder infection                    | 420mg      | 1         | 4%  | 0        | 0% | 1   | 4%  |
|                                      | 840mg      | 1         | 8%  | 0        | 0% | 1   | 8%  |
|                                      | All        | 2         | 5%  | 0        | 0% | 2   | 5%  |
| Bloating                             | 420mg      | 4         | 17% | 0        | 0% | 4   | 17% |
|                                      | All        | 4         | 11% | 0        | 0% | 4   | 11% |

| Toxicity Type                                                          | Dose Level | Grade 1-2 |     | Grade ≥3 |    | Any |     |
|------------------------------------------------------------------------|------------|-----------|-----|----------|----|-----|-----|
|                                                                        |            | n         | %   | n        | %  | n   | %   |
| Blood and lymphatic system disorders - Other, specify: Iron Deficiency | 420mg      | 1         | 4%  | 0        | 0% | 1   | 4%  |
|                                                                        | All        | 1         | 3%  | 0        | 0% | 1   | 3%  |
| Blood bilirubin increased                                              | 420mg      | 5         | 21% | 0        | 0% | 5   | 21% |
|                                                                        | 840mg      | 2         | 15% | 1        | 8% | 3   | 23% |
|                                                                        | All        | 7         | 19% | 1        | 3% | 8   | 22% |
| Blood lactate dehydrogenase increased                                  | 420mg      | 1         | 4%  | 0        | 0% | 1   | 4%  |
|                                                                        | All        | 1         | 3%  | 0        | 0% | 1   | 3%  |
| Blurred vision                                                         | 420mg      | 3         | 13% | 0        | 0% | 3   | 13% |
|                                                                        | All        | 3         | 8%  | 0        | 0% | 3   | 8%  |
| Bone pain                                                              | 420mg      | 1         | 4%  | 0        | 0% | 1   | 4%  |
|                                                                        | 840mg      | 1         | 8%  | 0        | 0% | 1   | 8%  |
|                                                                        | All        | 2         | 5%  | 0        | 0% | 2   | 5%  |
| Bronchial infection                                                    | 420mg      | 1         | 4%  | 0        | 0% | 1   | 4%  |
|                                                                        | All        | 1         | 3%  | 0        | 0% | 1   | 3%  |
| Bruising                                                               | 420mg      | 10        | 42% | 0        | 0% | 10  | 42% |
|                                                                        | 840mg      | 6         | 46% | 0        | 0% | 6   | 46% |
|                                                                        | All        | 16        | 43% | 0        | 0% | 16  | 43% |
| Bullous dermatitis                                                     | 420mg      | 1         | 4%  | 0        | 0% | 1   | 4%  |
|                                                                        | 840mg      | 2         | 15% | 0        | 0% | 2   | 15% |
|                                                                        | All        | 3         | 8%  | 0        | 0% | 3   | 8%  |
| Buttock pain                                                           | 840mg      | 1         | 8%  | 0        | 0% | 1   | 8%  |
|                                                                        | All        | 1         | 3%  | 0        | 0% | 1   | 3%  |
| Cardiac disorders - Other, specify: Chest Heaviness                    | 840mg      | 1         | 8%  | 0        | 0% | 1   | 8%  |
|                                                                        | All        | 1         | 3%  | 0        | 0% | 1   | 3%  |
| Cardiac disorders - Other, specify: "Heart Whooshing"                  | 840mg      | 1         | 8%  | 0        | 0% | 1   | 8%  |
|                                                                        | All        | 1         | 3%  | 0        | 0% | 1   | 3%  |
| Cataract                                                               | 420mg      | 2         | 8%  | 0        | 0% | 2   | 8%  |

| Toxicity Type        | Dose Level | Grade 1-2 |     | Grade ≥3 |    | Any |     |
|----------------------|------------|-----------|-----|----------|----|-----|-----|
|                      |            | n         | %   | n        | %  | n   | %   |
|                      | All        | 2         | 5%  | 0        | 0% | 2   | 5%  |
| Chest pain - cardiac | 420mg      | 2         | 8%  | 0        | 0% | 2   | 8%  |
|                      | All        | 2         | 5%  | 0        | 0% | 2   | 5%  |
| Chest wall pain      | 420mg      | 2         | 8%  | 0        | 0% | 2   | 8%  |
|                      | All        | 2         | 5%  | 0        | 0% | 2   | 5%  |
| Chills               | 420mg      | 4         | 17% | 0        | 0% | 4   | 17% |
|                      | All        | 4         | 11% | 0        | 0% | 4   | 11% |
| Cholecystitis        | 420mg      | 1         | 4%  | 1        | 4% | 2   | 8%  |
|                      | All        | 1         | 3%  | 1        | 3% | 2   | 5%  |
| Cholesterol high     | 420mg      | 2         | 8%  | 0        | 0% | 2   | 8%  |
|                      | 840mg      | 1         | 8%  | 0        | 0% | 1   | 8%  |
|                      | All        | 3         | 8%  | 0        | 0% | 3   | 8%  |
| Colitis              | 840mg      | 0         | 0%  | 1        | 8% | 1   | 8%  |
|                      | All        | 0         | 0%  | 1        | 3% | 1   | 3%  |
| Confusion            | 420mg      | 1         | 4%  | 0        | 0% | 1   | 4%  |
|                      | 840mg      | 2         | 15% | 0        | 0% | 2   | 15% |
|                      | All        | 3         | 8%  | 0        | 0% | 3   | 8%  |
| Conjunctivitis       | 840mg      | 2         | 15% | 0        | 0% | 2   | 15% |
|                      | All        | 2         | 5%  | 0        | 0% | 2   | 5%  |
| Constipation         | 420mg      | 7         | 29% | 0        | 0% | 7   | 29% |
|                      | 840mg      | 2         | 15% | 0        | 0% | 2   | 15% |
|                      | All        | 9         | 24% | 0        | 0% | 9   | 24% |
| Cough                | 420mg      | 6         | 25% | 1        | 4% | 7   | 29% |
|                      | 840mg      | 7         | 54% | 0        | 0% | 7   | 54% |
|                      | All        | 13        | 35% | 1        | 3% | 14  | 38% |
| Creatinine increased | 420mg      | 6         | 25% | 0        | 0% | 6   | 25% |
|                      | 840mg      | 4         | 31% | 0        | 0% | 4   | 31% |
|                      | All        | 10        | 27% | 0        | 0% | 10  | 27% |
| Dehydration          | 840mg      | 1         | 8%  | 0        | 0% | 1   | 8%  |
|                      | All        | 1         | 3%  | 0        | 0% | 1   | 3%  |

| Toxicity Type | Dose Level | Grade 1-2 |     | Grade ≥3 |    | Any |     |
|---------------|------------|-----------|-----|----------|----|-----|-----|
|               |            | n         | %   | n        | %  | n   | %   |
| Depression    | 420mg      | 1         | 4%  | 0        | 0% | 1   | 4%  |
|               | 840mg      | 1         | 8%  | 0        | 0% | 1   | 8%  |
|               | All        | 2         | 5%  | 0        | 0% | 2   | 5%  |
| Diarrhea      | 420mg      | 14        | 58% | 0        | 0% | 14  | 58% |
|               | 840mg      | 8         | 62% | 0        | 0% | 8   | 62% |
|               | All        | 22        | 59% | 0        | 0% | 22  | 59% |
| Dizziness     | 420mg      | 9         | 38% | 0        | 0% | 9   | 38% |
|               | 840mg      | 4         | 31% | 0        | 0% | 4   | 31% |
|               | All        | 13        | 35% | 0        | 0% | 13  | 35% |
| Dry eye       | 420mg      | 1         | 4%  | 0        | 0% | 1   | 4%  |
|               | All        | 1         | 3%  | 0        | 0% | 1   | 3%  |
| Dry mouth     | 420mg      | 4         | 17% | 0        | 0% | 4   | 17% |
|               | 840mg      | 2         | 15% | 0        | 0% | 2   | 15% |
|               | All        | 6         | 16% | 0        | 0% | 6   | 16% |
| Dry skin      | 420mg      | 3         | 13% | 0        | 0% | 3   | 13% |
|               | 840mg      | 3         | 23% | 0        | 0% | 3   | 23% |
|               | All        | 6         | 16% | 0        | 0% | 6   | 16% |
| Dysarthria    | 840mg      | 1         | 8%  | 0        | 0% | 1   | 8%  |
|               | All        | 1         | 3%  | 0        | 0% | 1   | 3%  |
| Dysgeusia     | 420mg      | 1         | 4%  | 0        | 0% | 1   | 4%  |
|               | All        | 1         | 3%  | 0        | 0% | 1   | 3%  |
| Dyspepsia     | 420mg      | 1         | 4%  | 0        | 0% | 1   | 4%  |
|               | 840mg      | 1         | 8%  | 0        | 0% | 1   | 8%  |
|               | All        | 2         | 5%  | 0        | 0% | 2   | 5%  |
| Dysphagia     | 420mg      | 1         | 4%  | 0        | 0% | 1   | 4%  |
|               | All        | 1         | 3%  | 0        | 0% | 1   | 3%  |
| Dyspnea       | 420mg      | 5         | 21% | 1        | 4% | 6   | 25% |
|               | All        | 5         | 14% | 1        | 3% | 6   | 16% |
| Ear pain      | 420mg      | 1         | 4%  | 0        | 0% | 1   | 4%  |
|               | 840mg      | 1         | 8%  | 0        | 0% | 1   | 8%  |



| Toxicity Type                                                        | Dose Level | Grade 1-2 |     | Grade ≥3 |    | Any |     |
|----------------------------------------------------------------------|------------|-----------|-----|----------|----|-----|-----|
|                                                                      |            | n         | %   | n        | %  | n   | %   |
|                                                                      | All        | 2         | 5%  | 0        | 0% | 2   | 5%  |
| Eczema                                                               | 420mg      | 1         | 4%  | 0        | 0% | 1   | 4%  |
|                                                                      | All        | 1         | 3%  | 0        | 0% | 1   | 3%  |
| Edema face                                                           | 420mg      | 1         | 4%  | 0        | 0% | 1   | 4%  |
|                                                                      | All        | 1         | 3%  | 0        | 0% | 1   | 3%  |
| Edema limbs                                                          | 420mg      | 9         | 38% | 0        | 0% | 9   | 38% |
|                                                                      | 840mg      | 5         | 38% | 0        | 0% | 5   | 38% |
|                                                                      | All        | 14        | 38% | 0        | 0% | 14  | 38% |
| Ejection fraction decreased                                          | 840mg      | 0         | 0%  | 1        | 8% | 1   | 8%  |
|                                                                      | All        | 0         | 0%  | 1        | 3% | 1   | 3%  |
| Enterocolitis                                                        | 420mg      | 0         | 0%  | 1        | 4% | 1   | 4%  |
|                                                                      | All        | 0         | 0%  | 1        | 3% | 1   | 3%  |
| Epistaxis                                                            | 420mg      | 2         | 8%  | 0        | 0% | 2   | 8%  |
|                                                                      | 840mg      | 3         | 23% | 0        | 0% | 3   | 23% |
|                                                                      | All        | 5         | 14% | 0        | 0% | 5   | 14% |
| Erythema multiforme                                                  | 420mg      | 5         | 21% | 0        | 0% | 5   | 21% |
|                                                                      | All        | 5         | 14% | 0        | 0% | 5   | 14% |
| Eye disorders - Other, specify: Style on Right Eye                   | 420mg      | 1         | 4%  | 0        | 0% | 1   | 4%  |
|                                                                      | All        | 1         | 3%  | 0        | 0% | 1   | 3%  |
| Eye disorders - Other, specify: Watery Itchy Eyes                    | 420mg      | 1         | 4%  | 0        | 0% | 1   | 4%  |
|                                                                      | All        | 1         | 3%  | 0        | 0% | 1   | 3%  |
| Eye disorders - Other, specify: Subconjunctival Hemorrhage Right eye | 420mg      | 1         | 4%  | 0        | 0% | 1   | 4%  |
|                                                                      | All        | 1         | 3%  | 0        | 0% | 1   | 3%  |
| Eye disorders - Other, specify: Right Eye Redness                    | 420mg      | 1         | 4%  | 0        | 0% | 1   | 4%  |
|                                                                      | All        | 1         | 3%  | 0        | 0% | 1   | 3%  |
| Eyelid function disorder                                             | 420mg      | 1         | 4%  | 0        | 0% | 1   | 4%  |
|                                                                      | All        | 1         | 3%  | 0        | 0% | 1   | 3%  |
| Fall                                                                 | 420mg      | 6         | 25% | 0        | 0% | 6   | 25% |
|                                                                      | 840mg      | 1         | 8%  | 0        | 0% | 1   | 8%  |

| Toxicity Type                   | Dose Level | Grade 1-2 |     | Grade ≥3 |     | Any |     |
|---------------------------------|------------|-----------|-----|----------|-----|-----|-----|
|                                 |            | n         | %   | n        | %   | n   | %   |
|                                 | All        | 7         | 19% | 0        | 0%  | 7   | 19% |
| Fatigue                         | 420mg      | 12        | 50% | 0        | 0%  | 12  | 50% |
|                                 | 840mg      | 8         | 62% | 0        | 0%  | 8   | 62% |
|                                 | All        | 20        | 54% | 0        | 0%  | 20  | 54% |
| Febrile neutropenia             | 420mg      | 0         | 0%  | 3        | 13% | 3   | 13% |
|                                 | 840mg      | 0         | 0%  | 1        | 8%  | 1   | 8%  |
|                                 | All        | 0         | 0%  | 4        | 11% | 4   | 11% |
| Fever                           | 420mg      | 2         | 8%  | 0        | 0%  | 2   | 8%  |
|                                 | 840mg      | 1         | 8%  | 0        | 0%  | 1   | 8%  |
|                                 | All        | 3         | 8%  | 0        | 0%  | 3   | 8%  |
| Flank pain                      | 420mg      | 1         | 4%  | 0        | 0%  | 1   | 4%  |
|                                 | All        | 1         | 3%  | 0        | 0%  | 1   | 3%  |
| Flashing lights                 | 420mg      | 1         | 4%  | 0        | 0%  | 1   | 4%  |
|                                 | All        | 1         | 3%  | 0        | 0%  | 1   | 3%  |
| Floaters                        | 420mg      | 1         | 4%  | 0        | 0%  | 1   | 4%  |
|                                 | All        | 1         | 3%  | 0        | 0%  | 1   | 3%  |
| Flu like symptoms               | 420mg      | 2         | 8%  | 0        | 0%  | 2   | 8%  |
|                                 | 840mg      | 3         | 23% | 0        | 0%  | 3   | 23% |
|                                 | All        | 5         | 14% | 0        | 0%  | 5   | 14% |
| Fracture                        | 420mg      | 2         | 8%  | 0        | 0%  | 2   | 8%  |
|                                 | All        | 2         | 5%  | 0        | 0%  | 2   | 5%  |
| Gait disturbance                | 420mg      | 1         | 4%  | 0        | 0%  | 1   | 4%  |
|                                 | All        | 1         | 3%  | 0        | 0%  | 1   | 3%  |
| Gastritis                       | 420mg      | 1         | 4%  | 0        | 0%  | 1   | 4%  |
|                                 | All        | 1         | 3%  | 0        | 0%  | 1   | 3%  |
| Gastroesophageal reflux disease | 420mg      | 7         | 29% | 0        | 0%  | 7   | 29% |
|                                 | 840mg      | 1         | 8%  | 0        | 0%  | 1   | 8%  |
|                                 | All        | 8         | 22% | 0        | 0%  | 8   | 22% |
| Generalized muscle weakness     | 420mg      | 0         | 0%  | 1        | 4%  | 1   | 4%  |
|                                 | 840mg      | 3         | 23% | 0        | 0%  | 3   | 23% |

| Toxicity Type         | Dose Level | Grade 1-2 |     | Grade ≥3 |     | Any |     |
|-----------------------|------------|-----------|-----|----------|-----|-----|-----|
|                       |            | n         | %   | n        | %   | n   | %   |
|                       | All        | 3         | 8%  | 1        | 3%  | 4   | 11% |
| Hair texture abnormal | 420mg      | 1         | 4%  | 0        | 0%  | 1   | 4%  |
|                       | All        | 1         | 3%  | 0        | 0%  | 1   | 3%  |
| Headache              | 420mg      | 11        | 46% | 0        | 0%  | 11  | 46% |
|                       | 840mg      | 4         | 31% | 0        | 0%  | 4   | 31% |
|                       | All        | 15        | 41% | 0        | 0%  | 15  | 41% |
| Hearing impaired      | 420mg      | 1         | 4%  | 0        | 0%  | 1   | 4%  |
|                       | 840mg      | 2         | 15% | 0        | 0%  | 2   | 15% |
|                       | All        | 3         | 8%  | 0        | 0%  | 3   | 8%  |
| Heart failure         | 840mg      | 0         | 0%  | 2        | 15% | 2   | 15% |
|                       | All        | 0         | 0%  | 2        | 5%  | 2   | 5%  |
| Hematoma              | 840mg      | 1         | 8%  | 0        | 0%  | 1   | 8%  |
|                       | All        | 1         | 3%  | 0        | 0%  | 1   | 3%  |
| Hematuria             | 420mg      | 2         | 8%  | 0        | 0%  | 2   | 8%  |
|                       | 840mg      | 1         | 8%  | 0        | 0%  | 1   | 8%  |
|                       | All        | 3         | 8%  | 0        | 0%  | 3   | 8%  |
| Hoarseness            | 420mg      | 1         | 4%  | 0        | 0%  | 1   | 4%  |
|                       | All        | 1         | 3%  | 0        | 0%  | 1   | 3%  |
| Hot flashes           | 420mg      | 1         | 4%  | 0        | 0%  | 1   | 4%  |
|                       | All        | 1         | 3%  | 0        | 0%  | 1   | 3%  |
| Hypercalcemia         | 420mg      | 2         | 8%  | 0        | 0%  | 2   | 8%  |
|                       | All        | 2         | 5%  | 0        | 0%  | 2   | 5%  |
| Hyperglycemia         | 420mg      | 6         | 25% | 0        | 0%  | 6   | 25% |
|                       | 840mg      | 4         | 31% | 0        | 0%  | 4   | 31% |
|                       | All        | 10        | 27% | 0        | 0%  | 10  | 27% |
| Hyperhidrosis         | 420mg      | 3         | 13% | 0        | 0%  | 3   | 13% |
|                       | 840mg      | 2         | 15% | 0        | 0%  | 2   | 15% |
|                       | All        | 5         | 14% | 0        | 0%  | 5   | 14% |
| Hyperkalemia          | 420mg      | 3         | 13% | 0        | 0%  | 3   | 13% |
|                       | All        | 3         | 8%  | 0        | 0%  | 3   | 8%  |

| Toxicity Type     | Dose Level | Grade 1-2 |     | Grade ≥3 |     | Any |     |
|-------------------|------------|-----------|-----|----------|-----|-----|-----|
|                   |            | n         | %   | n        | %   | n   | %   |
| Hyperkeratosis    | 420mg      | 1         | 4%  | 0        | 0%  | 1   | 4%  |
|                   | All        | 1         | 3%  | 0        | 0%  | 1   | 3%  |
| Hypermagnesemia   | 840mg      | 1         | 8%  | 0        | 0%  | 1   | 8%  |
|                   | All        | 1         | 3%  | 0        | 0%  | 1   | 3%  |
| Hypernatremia     | 420mg      | 1         | 4%  | 0        | 0%  | 1   | 4%  |
|                   | 840mg      | 1         | 8%  | 0        | 0%  | 1   | 8%  |
|                   | All        | 2         | 5%  | 0        | 0%  | 2   | 5%  |
| Hyperphosphatemia | 420mg      | 1         | 4%  | 0        | 0%  | 1   | 4%  |
|                   | All        | 1         | 3%  | 0        | 0%  | 1   | 3%  |
| Hypertension      | 420mg      | 9         | 38% | 1        | 4%  | 10  | 42% |
|                   | 840mg      | 3         | 23% | 3        | 23% | 6   | 46% |
|                   | All        | 12        | 32% | 4        | 11% | 16  | 43% |
| Hyperuricemia     | 420mg      | 6         | 25% | 0        | 0%  | 6   | 25% |
|                   | 840mg      | 5         | 38% | 0        | 0%  | 5   | 38% |
|                   | All        | 11        | 30% | 0        | 0%  | 11  | 30% |
| Hypoalbuminemia   | 420mg      | 4         | 17% | 0        | 0%  | 4   | 17% |
|                   | 840mg      | 3         | 23% | 0        | 0%  | 3   | 23% |
|                   | All        | 7         | 19% | 0        | 0%  | 7   | 19% |
| Hypocalcemia      | 420mg      | 3         | 13% | 0        | 0%  | 3   | 13% |
|                   | 840mg      | 4         | 31% | 0        | 0%  | 4   | 31% |
|                   | All        | 7         | 19% | 0        | 0%  | 7   | 19% |
| Hypokalemia       | 420mg      | 1         | 4%  | 0        | 0%  | 1   | 4%  |
|                   | 840mg      | 2         | 15% | 0        | 0%  | 2   | 15% |
|                   | All        | 3         | 8%  | 0        | 0%  | 3   | 8%  |
| Hypomagnesemia    | 420mg      | 2         | 8%  | 0        | 0%  | 2   | 8%  |
|                   | All        | 2         | 5%  | 0        | 0%  | 2   | 5%  |
| Hyponatremia      | 420mg      | 1         | 4%  | 0        | 0%  | 1   | 4%  |
|                   | 840mg      | 1         | 8%  | 0        | 0%  | 1   | 8%  |
|                   | All        | 2         | 5%  | 0        | 0%  | 2   | 5%  |
| Hypophosphatemia  | 420mg      | 2         | 8%  | 3        | 13% | 5   | 21% |

| Toxicity Type                                                                         | Dose Level | Grade 1-2 |     | Grade ≥3 |    | Any |     |
|---------------------------------------------------------------------------------------|------------|-----------|-----|----------|----|-----|-----|
|                                                                                       |            | n         | %   | n        | %  | n   | %   |
|                                                                                       | All        | 2         | 5%  | 3        | 8% | 5   | 14% |
| Hypotension                                                                           | 840mg      | 1         | 8%  | 0        | 0% | 1   | 8%  |
|                                                                                       | All        | 1         | 3%  | 0        | 0% | 1   | 3%  |
| Hypothyroidism                                                                        | 840mg      | 1         | 8%  | 0        | 0% | 1   | 8%  |
|                                                                                       | All        | 1         | 3%  | 0        | 0% | 1   | 3%  |
| Infections and infestations - Other, specify: Shingles                                | 420mg      | 1         | 4%  | 0        | 0% | 1   | 4%  |
|                                                                                       | All        | 1         | 3%  | 0        | 0% | 1   | 3%  |
| Infections and infestations - Other, specify: Tooth Abscess                           | 420mg      | 1         | 4%  | 0        | 0% | 1   | 4%  |
|                                                                                       | All        | 1         | 3%  | 0        | 0% | 1   | 3%  |
| Infections and infestations - Other, specify: Right Tonsil                            | 420mg      | 1         | 4%  | 0        | 0% | 1   | 4%  |
|                                                                                       | All        | 1         | 3%  | 0        | 0% | 1   | 3%  |
| Infections and infestations - Other, specify: Pinworm                                 | 420mg      | 1         | 4%  | 0        | 0% | 1   | 4%  |
|                                                                                       | All        | 1         | 3%  | 0        | 0% | 1   | 3%  |
| Infections and infestations - Other, specify: Throat Infection                        | 840mg      | 0         | 0%  | 1        | 8% | 1   | 8%  |
|                                                                                       | All        | 0         | 0%  | 1        | 3% | 1   | 3%  |
| Injury, poisoning and procedural complications - Other, specify: Wound Left Wrist     | 420mg      | 1         | 4%  | 0        | 0% | 1   | 4%  |
|                                                                                       | All        | 1         | 3%  | 0        | 0% | 1   | 3%  |
| Injury, poisoning and procedural complications - Other, specify: Tick Bite            | 420mg      | 1         | 4%  | 0        | 0% | 1   | 4%  |
|                                                                                       | All        | 1         | 3%  | 0        | 0% | 1   | 3%  |
| Injury, poisoning and procedural complications - Other, specify: Cut on Left Wrist    | 420mg      | 1         | 4%  | 0        | 0% | 1   | 4%  |
|                                                                                       | All        | 1         | 3%  | 0        | 0% | 1   | 3%  |
| Injury, poisoning and procedural complications - Other, specify: Injury Right Toenail | 420mg      | 1         | 4%  | 0        | 0% | 1   | 4%  |
|                                                                                       | All        | 1         | 3%  | 0        | 0% | 1   | 3%  |
| Insomnia                                                                              | 420mg      | 3         | 13% | 0        | 0% | 3   | 13% |
|                                                                                       | 840mg      | 4         | 31% | 0        | 0% | 4   | 31% |
|                                                                                       | All        | 7         | 19% | 0        | 0% | 7   | 19% |
| Joint range of motion decreased                                                       | 420mg      | 1         | 4%  | 0        | 0% | 1   | 4%  |
|                                                                                       | All        | 1         | 3%  | 0        | 0% | 1   | 3%  |

| Toxicity Type                         | Dose Level | Grade 1-2 |     | Grade ≥3 |     | Any |     |
|---------------------------------------|------------|-----------|-----|----------|-----|-----|-----|
|                                       |            | n         | %   | n        | %   | n   | %   |
| Laryngeal inflammation                | 420mg      | 1         | 4%  | 0        | 0%  | 1   | 4%  |
|                                       | All        | 1         | 3%  | 0        | 0%  | 1   | 3%  |
| Laryngitis                            | 420mg      | 1         | 4%  | 0        | 0%  | 1   | 4%  |
|                                       | All        | 1         | 3%  | 0        | 0%  | 1   | 3%  |
| Left ventricular systolic dysfunction | 840mg      | 0         | 0%  | 1        | 8%  | 1   | 8%  |
|                                       | All        | 0         | 0%  | 1        | 3%  | 1   | 3%  |
| Lethargy                              | 420mg      | 1         | 4%  | 0        | 0%  | 1   | 4%  |
|                                       | All        | 1         | 3%  | 0        | 0%  | 1   | 3%  |
| Leukocytosis                          | 420mg      | 0         | 0%  | 1        | 4%  | 1   | 4%  |
|                                       | All        | 0         | 0%  | 1        | 3%  | 1   | 3%  |
| Lip infection                         | 420mg      | 1         | 4%  | 0        | 0%  | 1   | 4%  |
|                                       | All        | 1         | 3%  | 0        | 0%  | 1   | 3%  |
| Localized edema                       | 420mg      | 1         | 4%  | 0        | 0%  | 1   | 4%  |
|                                       | All        | 1         | 3%  | 0        | 0%  | 1   | 3%  |
| Lung infection                        | 420mg      | 1         | 4%  | 2        | 8%  | 3   | 13% |
|                                       | 840mg      | 0         | 0%  | 4        | 31% | 4   | 31% |
|                                       | All        | 1         | 3%  | 6        | 16% | 7   | 19% |
| Lymphocyte count decreased            | 420mg      | 1         | 4%  | 5        | 21% | 6   | 25% |
|                                       | 840mg      | 5         | 38% | 2        | 15% | 7   | 54% |
|                                       | All        | 6         | 16% | 7        | 19% | 13  | 35% |
| Lymphocyte count increased            | 420mg      | 2         | 8%  | 2        | 8%  | 4   | 17% |
|                                       | 840mg      | 1         | 8%  | 0        | 0%  | 1   | 8%  |
|                                       | All        | 3         | 8%  | 2        | 5%  | 5   | 14% |
| Malaise                               | 420mg      | 1         | 4%  | 0        | 0%  | 1   | 4%  |
|                                       | All        | 1         | 3%  | 0        | 0%  | 1   | 3%  |
| Menorrhagia                           | 840mg      | 1         | 8%  | 0        | 0%  | 1   | 8%  |
|                                       | All        | 1         | 3%  | 0        | 0%  | 1   | 3%  |
| Mucositis oral                        | 420mg      | 5         | 21% | 0        | 0%  | 5   | 21% |
|                                       | 840mg      | 4         | 31% | 0        | 0%  | 4   | 31% |
|                                       | All        | 9         | 24% | 0        | 0%  | 9   | 24% |

| Toxicity Type                                                                                                          | Dose Level | Grade 1-2 |     | Grade ≥3 |    | Any |     |
|------------------------------------------------------------------------------------------------------------------------|------------|-----------|-----|----------|----|-----|-----|
|                                                                                                                        |            | n         | %   | n        | %  | n   | %   |
| Muscle cramp                                                                                                           | 420mg      | 2         | 8%  | 0        | 0% | 2   | 8%  |
|                                                                                                                        | All        | 2         | 5%  | 0        | 0% | 2   | 5%  |
| Musculoskeletal and connective tissue disorder - Other, specify: Plantar Fasciitis Right Foot                          | 420mg      | 1         | 4%  | 0        | 0% | 1   | 4%  |
|                                                                                                                        | All        | 1         | 3%  | 0        | 0% | 1   | 3%  |
| Musculoskeletal and connective tissue disorder - Other, specify: Tenosynovitis Right Middle Finger                     | 840mg      | 1         | 8%  | 0        | 0% | 1   | 8%  |
|                                                                                                                        | All        | 1         | 3%  | 0        | 0% | 1   | 3%  |
| Musculoskeletal and connective tissue disorder - Other, specify: Rotator Cuff Injury                                   | 840mg      | 1         | 8%  | 0        | 0% | 1   | 8%  |
|                                                                                                                        | All        | 1         | 3%  | 0        | 0% | 1   | 3%  |
| Musculoskeletal and connective tissue disorder - Other, specify: Right Ankle Sprain                                    | 420mg      | 1         | 4%  | 0        | 0% | 1   | 4%  |
|                                                                                                                        | All        | 1         | 3%  | 0        | 0% | 1   | 3%  |
| Myalgia                                                                                                                | 420mg      | 12        | 50% | 0        | 0% | 12  | 50% |
|                                                                                                                        | 840mg      | 8         | 62% | 0        | 0% | 8   | 62% |
|                                                                                                                        | All        | 20        | 54% | 0        | 0% | 20  | 54% |
| Nail changes                                                                                                           | 420mg      | 1         | 4%  | 0        | 0% | 1   | 4%  |
|                                                                                                                        | All        | 1         | 3%  | 0        | 0% | 1   | 3%  |
| Nail infection                                                                                                         | 420mg      | 3         | 13% | 1        | 4% | 4   | 17% |
|                                                                                                                        | 840mg      | 1         | 8%  | 0        | 0% | 1   | 8%  |
|                                                                                                                        | All        | 4         | 11% | 1        | 3% | 5   | 14% |
| Nasal congestion                                                                                                       | 420mg      | 6         | 25% | 0        | 0% | 6   | 25% |
|                                                                                                                        | 840mg      | 4         | 31% | 0        | 0% | 4   | 31% |
|                                                                                                                        | All        | 10        | 27% | 0        | 0% | 10  | 27% |
| Nausea                                                                                                                 | 420mg      | 11        | 46% | 0        | 0% | 11  | 46% |
|                                                                                                                        | 840mg      | 8         | 62% | 0        | 0% | 8   | 62% |
|                                                                                                                        | All        | 19        | 51% | 0        | 0% | 19  | 51% |
| Neoplasms benign, malignant and unspecified (incl cysts and polyps) - Other, specify: basal cell carcinoma of the skin | 840mg      | 3         | 23% | 0        | 0% | 3   | 23% |
|                                                                                                                        | All        | 3         | 8%  | 0        | 0% | 3   | 8%  |
|                                                                                                                        | 420mg      | 2         | 9%  | 0        | 0% | 2   | 9%  |

| Toxicity Type                                                                                                                      | Dose Level | Grade 1-2 |     | Grade ≥3 |     | Any |     |
|------------------------------------------------------------------------------------------------------------------------------------|------------|-----------|-----|----------|-----|-----|-----|
|                                                                                                                                    |            | n         | %   | n        | %   | n   | %   |
| Neoplasms benign, malignant and unspecified (incl cysts and polyps) - Other, specify: melanoma                                     | 840mg      | 1         | 8%  | 0        | 0%  | 1   | 8%  |
|                                                                                                                                    | All        | 3         | 8%  | 0        | 0%  | 3   | 8%  |
| Neoplasms benign, malignant and unspecified (incl cysts and polyps) - Other, specify: non-invasive high grade urothelial carcinoma | 420mg      | 1         | 4%  | 0        | 0%  | 1   | 4%  |
|                                                                                                                                    | All        | 1         | 3%  | 0        | 0%  | 1   | 3%  |
| Neoplasms benign, malignant and unspecified (incl cysts and polyps) - Other, specify: bladder polyp                                | 420mg      | 1         | 4%  | 0        | 0%  | 1   | 4%  |
|                                                                                                                                    | All        | 1         | 3%  | 0        | 0%  | 1   | 3%  |
| Neoplasms benign, malignant and unspecified (incl cysts and polyps) - Other, specify: benign colon polyp                           | 420mg      | 2         | 8%  | 0        | 0%  | 2   | 8%  |
|                                                                                                                                    | All        | 2         | 6%  | 0        | 0%  | 2   | 6%  |
| Neoplasms benign, malignant and unspecified (incl cysts and polyps) - Other, specify: colon cancer                                 | 420mg      | 1         | 4%  | 0        | 0%  | 1   | 4%  |
|                                                                                                                                    | All        | 1         | 3%  | 0        | 0%  | 1   | 3%  |
| Neoplasms benign, malignant and unspecified (incl cysts and polyps) - Other, specify: lesions                                      | 420mg      | 1         | 4%  | 0        | 0%  | 1   | 4%  |
|                                                                                                                                    | All        | 1         | 3%  | 0        | 0%  | 1   | 3%  |
| Neoplasms benign, malignant and unspecified (incl cysts and polyps) - Other, specify: squamous cell carcinoma of the skin          | 420mg      | 1         | 4%  | 0        | 0%  | 1   | 4%  |
|                                                                                                                                    | 840mg      | 1         | 8%  | 0        | 0%  | 1   | 8%  |
|                                                                                                                                    | All        | 2         | 6%  | 0        | 0%  | 2   | 6%  |
| Neoplasms benign, malignant and unspecified (incl cysts and polyps) - Other, specify: polyp                                        | 840mg      | 1         | 8%  | 0        | 0%  | 1   | 8%  |
|                                                                                                                                    | All        | 1         | 3%  | 0        | 0%  | 1   | 3%  |
| Nervous system disorders - Other, specify: Spinal Cord Compression                                                                 | 420mg      | 0         | 0%  | 1        | 4%  | 1   | 4%  |
|                                                                                                                                    | All        | 0         | 0%  | 1        | 3%  | 1   | 3%  |
| Neutrophil count decreased                                                                                                         | 420mg      | 1         | 4%  | 6        | 25% | 7   | 29% |
|                                                                                                                                    | 840mg      | 4         | 31% | 2        | 15% | 6   | 46% |
|                                                                                                                                    | All        | 5         | 14% | 8        | 22% | 13  | 35% |
| Non-cardiac chest pain                                                                                                             | 420mg      | 2         | 8%  | 0        | 0%  | 2   | 8%  |
|                                                                                                                                    | 840mg      | 1         | 8%  | 0        | 0%  | 1   | 8%  |
|                                                                                                                                    | All        | 3         | 8%  | 0        | 0%  | 3   | 8%  |
| Oral hemorrhage                                                                                                                    | 420mg      | 1         | 4%  | 0        | 0%  | 1   | 4%  |



| Toxicity Type               | Dose Level | Grade 1-2 |     | Grade ≥3 |    | Any |     |
|-----------------------------|------------|-----------|-----|----------|----|-----|-----|
|                             |            | n         | %   | n        | %  | n   | %   |
|                             | 840mg      | 1         | 8%  | 0        | 0% | 1   | 8%  |
|                             | All        | 2         | 5%  | 0        | 0% | 2   | 5%  |
|                             |            |           |     |          |    |     |     |
| Oral pain                   | 420mg      | 1         | 4%  | 0        | 0% | 1   | 4%  |
|                             | 840mg      | 2         | 15% | 0        | 0% | 2   | 15% |
|                             | All        | 3         | 8%  | 0        | 0% | 3   | 8%  |
| Osteoporosis                | 420mg      | 1         | 4%  | 0        | 0% | 1   | 4%  |
|                             | All        | 1         | 3%  | 0        | 0% | 1   | 3%  |
| Otitis externa              | 840mg      | 1         | 8%  | 0        | 0% | 1   | 8%  |
|                             | All        | 1         | 3%  | 0        | 0% | 1   | 3%  |
| Otitis media                | 420mg      | 1         | 4%  | 0        | 0% | 1   | 4%  |
|                             | 840mg      | 1         | 8%  | 0        | 0% | 1   | 8%  |
|                             | All        | 2         | 5%  | 0        | 0% | 2   | 5%  |
| Pain                        | 420mg      | 5         | 21% | 1        | 4% | 6   | 25% |
|                             | 840mg      | 1         | 8%  | 0        | 0% | 1   | 8%  |
|                             | All        | 6         | 16% | 1        | 3% | 7   | 19% |
| Pain in extremity           | 420mg      | 6         | 25% | 0        | 0% | 6   | 25% |
|                             | 840mg      | 2         | 15% | 0        | 0% | 2   | 15% |
|                             | All        | 8         | 22% | 0        | 0% | 8   | 22% |
| Palpitations                | 420mg      | 3         | 13% | 0        | 0% | 3   | 13% |
|                             | 840mg      | 3         | 23% | 0        | 0% | 3   | 23% |
|                             | All        | 6         | 16% | 0        | 0% | 6   | 16% |
| Paresthesia                 | 420mg      | 7         | 29% | 0        | 0% | 7   | 29% |
|                             | 840mg      | 4         | 31% | 0        | 0% | 4   | 31% |
|                             | All        | 11        | 30% | 0        | 0% | 11  | 30% |
| Paronychia                  | 420mg      | 1         | 4%  | 1        | 4% | 2   | 8%  |
|                             | All        | 1         | 3%  | 1        | 3% | 2   | 5%  |
| Periodontal disease         | 420mg      | 1         | 4%  | 0        | 0% | 1   | 4%  |
|                             | All        | 1         | 3%  | 0        | 0% | 1   | 3%  |
| Peripheral motor neuropathy | 840mg      | 1         | 8%  | 0        | 0% | 1   | 8%  |
|                             | All        | 1         | 3%  | 0        | 0% | 1   | 3%  |

| Toxicity Type                 | Dose Level | Grade 1-2 |     | Grade ≥3 |     | Any |     |
|-------------------------------|------------|-----------|-----|----------|-----|-----|-----|
|                               |            | n         | %   | n        | %   | n   | %   |
| Peripheral sensory neuropathy | 420mg      | 1         | 4%  | 0        | 0%  | 1   | 4%  |
|                               | All        | 1         | 3%  | 0        | 0%  | 1   | 3%  |
| Pharyngitis                   | 840mg      | 1         | 8%  | 0        | 0%  | 1   | 8%  |
|                               | All        | 1         | 3%  | 0        | 0%  | 1   | 3%  |
| Photosensitivity              | 420mg      | 1         | 4%  | 0        | 0%  | 1   | 4%  |
|                               | All        | 1         | 3%  | 0        | 0%  | 1   | 3%  |
| Platelet count decreased      | 420mg      | 4         | 17% | 7        | 29% | 11  | 46% |
|                               | 840mg      | 3         | 23% | 1        | 8%  | 4   | 31% |
|                               | All        | 7         | 19% | 8        | 22% | 15  | 41% |
| Pleural effusion              | 840mg      | 1         | 8%  | 0        | 0%  | 1   | 8%  |
|                               | All        | 1         | 3%  | 0        | 0%  | 1   | 3%  |
| Pneumonitis                   | 840mg      | 0         | 0%  | 1        | 8%  | 1   | 8%  |
|                               | All        | 0         | 0%  | 1        | 3%  | 1   | 3%  |
| Postnasal drip                | 420mg      | 3         | 13% | 0        | 0%  | 3   | 13% |
|                               | All        | 3         | 8%  | 0        | 0%  | 3   | 8%  |
| Productive cough              | 420mg      | 5         | 21% | 0        | 0%  | 5   | 21% |
|                               | 840mg      | 2         | 15% | 0        | 0%  | 2   | 15% |
|                               | All        | 7         | 19% | 0        | 0%  | 7   | 19% |
| Prostatic obstruction         | 420mg      | 0         | 0%  | 1        | 4%  | 1   | 4%  |
|                               | All        | 0         | 0%  | 1        | 3%  | 1   | 3%  |
| Pruritus                      | 420mg      | 2         | 8%  | 0        | 0%  | 2   | 8%  |
|                               | 840mg      | 1         | 8%  | 0        | 0%  | 1   | 8%  |
|                               | All        | 3         | 8%  | 0        | 0%  | 3   | 8%  |
| Psychosis                     | 840mg      | 1         | 8%  | 0        | 0%  | 1   | 8%  |
|                               | All        | 1         | 3%  | 0        | 0%  | 1   | 3%  |
| Rash acneiform                | 420mg      | 2         | 8%  | 0        | 0%  | 2   | 8%  |
|                               | 840mg      | 2         | 15% | 0        | 0%  | 2   | 15% |
|                               | All        | 4         | 11% | 0        | 0%  | 4   | 11% |
| Rash maculo-papular           | 420mg      | 8         | 33% | 2        | 8%  | 10  | 42% |
|                               | 840mg      | 4         | 31% | 0        | 0%  | 4   | 31% |

| Toxicity Type                                                                         | Dose Level | Grade 1-2 |     | Grade ≥3 |    | Any |     |
|---------------------------------------------------------------------------------------|------------|-----------|-----|----------|----|-----|-----|
|                                                                                       |            | n         | %   | n        | %  | n   | %   |
|                                                                                       | All        | 12        | 32% | 2        | 5% | 14  | 38% |
| Renal and urinary disorders - Other, specify: Bladder Polyps                          | 420mg      | 1         | 4%  | 0        | 0% | 1   | 4%  |
|                                                                                       | All        | 1         | 3%  | 0        | 0% | 1   | 3%  |
| Renal calculi                                                                         | 420mg      | 1         | 4%  | 0        | 0% | 1   | 4%  |
|                                                                                       | All        | 1         | 3%  | 0        | 0% | 1   | 3%  |
| Renal colic                                                                           | 420mg      | 1         | 4%  | 0        | 0% | 1   | 4%  |
|                                                                                       | 840mg      | 1         | 8%  | 0        | 0% | 1   | 8%  |
|                                                                                       | All        | 2         | 5%  | 0        | 0% | 2   | 5%  |
| Reproductive system and breast disorders - Other, specify: Blood in Semen             | 420mg      | 1         | 4%  | 0        | 0% | 1   | 4%  |
|                                                                                       | All        | 1         | 3%  | 0        | 0% | 1   | 3%  |
| Respiratory, thoracic and mediastinal disorders - Other, specify: Shortness of Breath | 420mg      | 1         | 4%  | 0        | 0% | 1   | 4%  |
|                                                                                       | All        | 1         | 3%  | 0        | 0% | 1   | 3%  |
| Restlessness                                                                          | 420mg      | 1         | 4%  | 0        | 0% | 1   | 4%  |
|                                                                                       | 840mg      | 1         | 8%  | 0        | 0% | 1   | 8%  |
|                                                                                       | All        | 2         | 5%  | 0        | 0% | 2   | 5%  |
| Rhinitis infective                                                                    | 420mg      | 2         | 8%  | 0        | 0% | 2   | 8%  |
|                                                                                       | All        | 2         | 5%  | 0        | 0% | 2   | 5%  |
| Sepsis                                                                                | 420mg      | 0         | 0%  | 1        | 4% | 1   | 4%  |
|                                                                                       | All        | 0         | 0%  | 1        | 3% | 1   | 3%  |
| Shingles                                                                              | 420mg      | 1         | 4%  | 0        | 0% | 1   | 4%  |
|                                                                                       | All        | 1         | 3%  | 0        | 0% | 1   | 3%  |
| Sinus bradycardia                                                                     | 420mg      | 5         | 21% | 0        | 0% | 5   | 21% |
|                                                                                       | 840mg      | 1         | 8%  | 0        | 0% | 1   | 8%  |
|                                                                                       | All        | 6         | 16% | 0        | 0% | 6   | 16% |
| Sinus tachycardia                                                                     | 420mg      | 1         | 4%  | 0        | 0% | 1   | 4%  |
|                                                                                       | 840mg      | 1         | 8%  | 0        | 0% | 1   | 8%  |
|                                                                                       | All        | 2         | 5%  | 0        | 0% | 2   | 5%  |
| Sinusitis                                                                             | 420mg      | 3         | 13% | 0        | 0% | 3   | 13% |
|                                                                                       | 840mg      | 2         | 15% | 0        | 0% | 2   | 15% |

| Toxicity Type                                                                    | Dose Level | Grade 1-2 |     | Grade ≥3 |    | Any |     |
|----------------------------------------------------------------------------------|------------|-----------|-----|----------|----|-----|-----|
|                                                                                  |            | n         | %   | n        | %  | n   | %   |
|                                                                                  | All        | 5         | 14% | 0        | 0% | 5   | 14% |
| Skin and subcutaneous tissue disorders - Other, specify: inflamed sebaceous cyst | 420mg      | 1         | 4%  | 0        | 0% | 1   | 4%  |
|                                                                                  | Any        | 1         | 3%  | 0        | 0% | 1   | 3%  |
| Skin and subcutaneous tissue disorders - Other, specify: cherry angiomas         | 420mg      | 1         | 4%  | 0        | 0% | 1   | 4%  |
|                                                                                  | Any        | 1         | 3%  | 0        | 0% | 1   | 3%  |
| Skin and subcutaneous tissue disorders - Other, specify: dermatitis              | 420mg      | 1         | 4%  | 0        | 0% | 1   | 4%  |
|                                                                                  | Any        | 1         | 3%  | 0        | 0% | 1   | 3%  |
| Skin and subcutaneous tissue disorders - Other, specify: follicular rash - scalp | 420mg      | 1         | 4%  | 0        | 0% | 1   | 4%  |
|                                                                                  | Any        | 1         | 3%  | 0        | 0% | 1   | 3%  |
| Skin and subcutaneous tissue disorders - Other, specify: rosacea                 | 420mg      | 1         | 4%  | 0        | 0% | 1   | 4%  |
|                                                                                  | Any        | 1         | 3%  | 0        | 0% | 1   | 3%  |
| Skin and subcutaneous tissue disorders - Other, specify: panniculitis            | 420mg      | 1         | 4%  | 0        | 0% | 1   | 4%  |
|                                                                                  | Any        | 1         | 3%  | 0        | 0% | 1   | 3%  |
| Skin and subcutaneous tissue disorders - Other, specify: erythematous scaly skin | 420mg      | 1         | 4%  | 0        | 0% | 1   | 4%  |
|                                                                                  | Any        | 1         | 3%  | 0        | 0% | 1   | 3%  |
| Skin and subcutaneous tissue disorders - Other, specify: precancerous lesions    | 840mg      | 1         | 8%  | 0        | 0% | 1   | 8%  |
|                                                                                  | Any        | 1         | 3%  | 0        | 0% | 1   | 3%  |
| Skin and subcutaneous tissue disorders - Other, specify: lesion on penis         | 840mg      | 1         | 8%  | 0        | 0% | 1   | 8%  |
|                                                                                  | Any        | 1         | 3%  | 0        | 0% | 1   | 3%  |
| Skin and subcutaneous tissue disorders - Other, specify: brittle nails           | 420mg      | 1         | 4%  | 0        | 0% | 1   | 4%  |
|                                                                                  | 840mg      | 1         | 8%  | 0        | 0% | 1   | 8%  |
|                                                                                  | Any        | 2         | 6%  | 0        | 0% | 2   | 6%  |
| Skin and subcutaneous tissue disorders - Other, specify: lipoma                  | 420mg      | 1         | 4%  | 0        | 0% | 1   | 4%  |
|                                                                                  | 840mg      | 1         | 8%  | 0        | 0% | 1   | 8%  |
|                                                                                  | Any        | 2         | 6%  | 0        | 0% | 2   | 6%  |
| Skin and subcutaneous tissue disorders - Other, specify: blood blister           | 420mg      | 1         | 4%  | 0        | 0% | 1   | 4%  |
|                                                                                  | Any        | 1         | 3%  | 0        | 0% | 1   | 3%  |

| Toxicity Type                                                                 | Dose Level | Grade 1-2 |     | Grade ≥3 |    | Any |     |
|-------------------------------------------------------------------------------|------------|-----------|-----|----------|----|-----|-----|
|                                                                               |            | n         | %   | n        | %  | n   | %   |
| Skin and subcutaneous tissue disorders - Other, specify: seborrheic keratosis | 420mg      | 1         | 4%  | 0        | 0% | 1   | 4%  |
|                                                                               | Any        | 1         | 3%  | 0        | 0% | 1   | 3%  |
| Skin and subcutaneous tissue disorders - Other, specify: jock itch            | 420mg      | 1         | 4%  | 0        | 0% | 1   | 4%  |
|                                                                               | Any        | 1         | 3%  | 0        | 0% | 1   | 3%  |
| Skin and subcutaneous tissue disorders - Other, specify: actinic keratosis    | 420mg      | 2         | 8%  | 0        | 0% | 2   | 8%  |
|                                                                               | Any        | 2         | 5%  | 0        | 0% | 2   | 5%  |
| Skin atrophy                                                                  | 840mg      | 1         | 8%  | 0        | 0% | 1   | 8%  |
|                                                                               | All        | 1         | 3%  | 0        | 0% | 1   | 3%  |
| Skin hyperpigmentation                                                        | 420mg      | 1         | 4%  | 0        | 0% | 1   | 4%  |
|                                                                               | All        | 1         | 3%  | 0        | 0% | 1   | 3%  |
| Skin infection                                                                | 420mg      | 2         | 8%  | 1        | 4% | 3   | 13% |
|                                                                               | 840mg      | 2         | 15% | 0        | 0% | 2   | 15% |
|                                                                               | All        | 4         | 11% | 1        | 3% | 5   | 14% |
| Skin ulceration                                                               | 420mg      | 2         | 8%  | 0        | 0% | 2   | 8%  |
|                                                                               | All        | 2         | 5%  | 0        | 0% | 2   | 5%  |
| Sleep apnea                                                                   | 420mg      | 1         | 4%  | 0        | 0% | 1   | 4%  |
|                                                                               | 840mg      | 0         | 0%  | 1        | 8% | 1   | 8%  |
|                                                                               | All        | 1         | 3%  | 1        | 3% | 2   | 5%  |
| Somnolence                                                                    | 420mg      | 1         | 4%  | 0        | 0% | 1   | 4%  |
|                                                                               | All        | 1         | 3%  | 0        | 0% | 1   | 3%  |
| Sore throat                                                                   | 420mg      | 4         | 17% | 0        | 0% | 4   | 17% |
|                                                                               | 840mg      | 3         | 23% | 0        | 0% | 3   | 23% |
|                                                                               | All        | 7         | 19% | 0        | 0% | 7   | 19% |
| Stomach pain                                                                  | 420mg      | 3         | 13% | 0        | 0% | 3   | 13% |
|                                                                               | 840mg      | 1         | 8%  | 0        | 0% | 1   | 8%  |
|                                                                               | All        | 4         | 11% | 0        | 0% | 4   | 11% |
| Stroke                                                                        | 420mg      | 1         | 4%  | 0        | 0% | 1   | 4%  |
|                                                                               | All        | 1         | 3%  | 0        | 0% | 1   | 3%  |
| Suicidal ideation                                                             | 840mg      | 1         | 8%  | 0        | 0% | 1   | 8%  |

| Toxicity Type               | Dose Level | Grade 1-2 |     | Grade ≥3 |    | Any |     |
|-----------------------------|------------|-----------|-----|----------|----|-----|-----|
|                             |            | n         | %   | n        | %  | n   | %   |
|                             | All        | 1         | 3%  | 0        | 0% | 1   | 3%  |
| Testicular pain             | 420mg      | 1         | 4%  | 0        | 0% | 1   | 4%  |
|                             | All        | 1         | 3%  | 0        | 0% | 1   | 3%  |
| Tinnitus                    | 420mg      | 2         | 8%  | 0        | 0% | 2   | 8%  |
|                             | All        | 2         | 5%  | 0        | 0% | 2   | 5%  |
| Tooth infection             | 420mg      | 1         | 4%  | 0        | 0% | 1   | 4%  |
|                             | All        | 1         | 3%  | 0        | 0% | 1   | 3%  |
| Toothache                   | 420mg      | 1         | 4%  | 0        | 0% | 1   | 4%  |
|                             | All        | 1         | 3%  | 0        | 0% | 1   | 3%  |
| Tracheal mucositis          | 420mg      | 1         | 4%  | 0        | 0% | 1   | 4%  |
|                             | All        | 1         | 3%  | 0        | 0% | 1   | 3%  |
| Tremor                      | 840mg      | 1         | 8%  | 0        | 0% | 1   | 8%  |
|                             | All        | 1         | 3%  | 0        | 0% | 1   | 3%  |
| Tumor pain                  | 840mg      | 1         | 8%  | 0        | 0% | 1   | 8%  |
|                             | All        | 1         | 3%  | 0        | 0% | 1   | 3%  |
| Upper respiratory infection | 420mg      | 10        | 42% | 1        | 4% | 11  | 46% |
|                             | 840mg      | 5         | 38% | 1        | 8% | 6   | 46% |
|                             | All        | 15        | 41% | 2        | 5% | 17  | 46% |
| Urinary frequency           | 420mg      | 1         | 4%  | 0        | 0% | 1   | 4%  |
|                             | 840mg      | 1         | 8%  | 0        | 0% | 1   | 8%  |
|                             | All        | 2         | 5%  | 0        | 0% | 2   | 5%  |
| Urinary incontinence        | 420mg      | 1         | 4%  | 0        | 0% | 1   | 4%  |
|                             | All        | 1         | 3%  | 0        | 0% | 1   | 3%  |
| Urinary tract infection     | 420mg      | 2         | 8%  | 0        | 0% | 2   | 8%  |
|                             | 840mg      | 3         | 23% | 1        | 8% | 4   | 31% |
|                             | All        | 5         | 14% | 1        | 3% | 6   | 16% |
| Urinary tract obstruction   | 840mg      | 1         | 8%  | 0        | 0% | 1   | 8%  |
|                             | All        | 1         | 3%  | 0        | 0% | 1   | 3%  |
| Urinary tract pain          | 420mg      | 1         | 4%  | 0        | 0% | 1   | 4%  |
|                             | 840mg      | 1         | 8%  | 0        | 0% | 1   | 8%  |

| Toxicity Type                                                                           | Dose Level | Grade 1-2 |     | Grade ≥3 |     | Any |     |
|-----------------------------------------------------------------------------------------|------------|-----------|-----|----------|-----|-----|-----|
|                                                                                         |            | n         | %   | n        | %   | n   | %   |
|                                                                                         | All        | 2         | 5%  | 0        | 0%  | 2   | 5%  |
| Urticaria                                                                               | 840mg      | 1         | 8%  | 0        | 0%  | 1   | 8%  |
|                                                                                         | All        | 1         | 3%  | 0        | 0%  | 1   | 3%  |
| Uveitis                                                                                 | 420mg      | 2         | 8%  | 0        | 0%  | 2   | 8%  |
|                                                                                         | All        | 2         | 5%  | 0        | 0%  | 2   | 5%  |
| Vaginal dryness                                                                         | 840mg      | 1         | 8%  | 0        | 0%  | 1   | 8%  |
|                                                                                         | All        | 1         | 3%  | 0        | 0%  | 1   | 3%  |
| Vascular disorders - Other, specify:<br>Chronic Venous Insufficiency in the<br>Left Leg | 420mg      | 1         | 4%  | 0        | 0%  | 1   | 4%  |
|                                                                                         | All        | 1         | 3%  | 0        | 0%  | 1   | 3%  |
| Vasovagal reaction                                                                      | 420mg      | 0         | 0%  | 1        | 4%  | 1   | 4%  |
|                                                                                         | All        | 0         | 0%  | 1        | 3%  | 1   | 3%  |
| Ventricular arrhythmia                                                                  | 420mg      | 1         | 4%  | 0        | 0%  | 1   | 4%  |
|                                                                                         | All        | 1         | 3%  | 0        | 0%  | 1   | 3%  |
| Vertigo                                                                                 | 420mg      | 1         | 4%  | 0        | 0%  | 1   | 4%  |
|                                                                                         | 840mg      | 1         | 8%  | 0        | 0%  | 1   | 8%  |
|                                                                                         | All        | 2         | 5%  | 0        | 0%  | 2   | 5%  |
| Vomiting                                                                                | 420mg      | 5         | 21% | 1        | 4%  | 6   | 25% |
|                                                                                         | 840mg      | 1         | 8%  | 0        | 0%  | 1   | 8%  |
|                                                                                         | All        | 6         | 16% | 1        | 3%  | 7   | 19% |
| Watering eyes                                                                           | 420mg      | 1         | 4%  | 0        | 0%  | 1   | 4%  |
|                                                                                         | All        | 1         | 3%  | 0        | 0%  | 1   | 3%  |
| Weight gain                                                                             | 420mg      | 3         | 13% | 0        | 0%  | 3   | 13% |
|                                                                                         | All        | 3         | 8%  | 0        | 0%  | 3   | 8%  |
| Weight loss                                                                             | 420mg      | 3         | 13% | 0        | 0%  | 3   | 13% |
|                                                                                         | 840mg      | 2         | 15% | 0        | 0%  | 2   | 15% |
|                                                                                         | All        | 5         | 14% | 0        | 0%  | 5   | 14% |
| White blood cell decreased                                                              | 420mg      | 1         | 4%  | 7        | 29% | 8   | 33% |
|                                                                                         | 840mg      | 4         | 31% | 1        | 8%  | 5   | 38% |
|                                                                                         | All        | 5         | 14% | 8        | 22% | 13  | 35% |

**Table S10: Analysis of Adverse Events by Dose Level**

| Adverse Event                         | 420mg (n=23) |          | 840mg (n=13) |          | p    |
|---------------------------------------|--------------|----------|--------------|----------|------|
|                                       | Grade 1-2    | Grade 3+ | Grade 1-2    | Grade 3+ |      |
| Arthralgia                            | 6 (26%)      | 0 (0%)   | 0 (0%)       | 0 (0%)   | 0.07 |
| Atrial fibrillation                   | 2 (9%)       | 0 (0%)   | 4 (31%)      | 0 (0%)   | 0.16 |
| Bruising                              | 6 (26%)      | 0 (0%)   | 3 (23%)      | 0 (0%)   | 1.0  |
| Diarrhea                              | 10 (43%)     | 0 (0%)   | 5 (38%)      | 0 (0%)   | 1.0  |
| Ejection fraction decreased           | 0 (0%)       | 0 (0%)   | 0 (0%)       | 1 (8%)   | 0.36 |
| Enterocolitis                         | 0 (0%)       | 1 (4%)   | 0 (0%)       | 0 (0%)   | 1.0  |
| Fatigue                               | 9 (39%)      | 0 (0%)   | 2 (15%)      | 0 (0%)   | 0.26 |
| Heart failure                         | 0 (0%)       | 0 (0%)   | 0 (0%)       | 1 (8%)   | 0.36 |
| Hyperuricemia                         | 2 (9%)       | 0 (0%)   | 3 (23%)      | 0 (0%)   | 0.33 |
| Hypophosphatemia                      | 0 (0%)       | 1 (4%)   | 0 (0%)       | 0 (0%)   | 1.0  |
| Left ventricular systolic dysfunction | 0 (0%)       | 0 (0%)   | 0 (0%)       | 1 (8%)   | 0.36 |
| Lung infection                        | 0 (0%)       | 1 (4%)   | 0 (0%)       | 1 (8%)   | 1.0  |
| Myalgia                               | 9 (39%)      | 0 (0%)   | 4 (31%)      | 0 (0%)   | 0.73 |
| Nausea                                | 5 (22%)      | 0 (0%)   | 7 (54%)      | 0 (0%)   | 0.07 |
| Rash maculopapular                    | 6 (26%)      | 1 (4%)   | 4 (31%)      | 0 (0%)   | 1.0  |
| Sepsis                                | 0 (0%)       | 1 (4%)   | 0 (0%)       | 0 (0%)   | 1.0  |
| Skin infection                        | 1 (4%)       | 1 (4%)   | 0 (0%)       | 0 (0%)   | 1.0  |
| Upper respiratory infection           | 0 (0%)       | 1 (4%)   | 1 (8%)       | 0 (0%)   | 1.0  |
| Urinary tract infection               | 0 (0%)       | 0 (0%)   | 1 (8%)       | 1 (8%)   | 0.12 |

Adverse events are listed if they occurred in a least 20% of patients within either dose level, or if there were any grade 3 or higher. Only adverse events attributed to study treatment were included. P-values are from Fisher's exact test, comparing proportion of adverse events between dose levels (regardless of grade). Data cuff-off for this analysis is 3/12/2018.



**Table S11: Summary of Non-Compartmental Pharmacokinetics Parameters**

| 420 mg     |                      |                          |                      | Parent drug                    |                              |                       |                    | Metabolite               |                                |
|------------|----------------------|--------------------------|----------------------|--------------------------------|------------------------------|-----------------------|--------------------|--------------------------|--------------------------------|
| Patient ID | T <sub>max</sub> (h) | C <sub>max</sub> (µg/mL) | t <sub>1/2</sub> (h) | AUC <sub>0-24h</sub> (h*µg/mL) | AUC <sub>0-∞</sub> (h*µg/mL) | Vd (L)                | CL (L/h)           | C <sub>max</sub> (µg/mL) | AUC <sub>0-24h</sub> (h*µg/mL) |
| 1          | 1.00                 | 33.00                    | 3.86                 | 336.61                         | 341.12                       | 6853.60               | 1231.24            | 19.90                    | 170.71                         |
| 2          | 1.03                 | 237.00                   | 5.34                 | 704.19                         | 724.07                       | 4469.48               | 580.05             | 107.00                   | 933.94                         |
| 3          | 1.95                 | 11.40                    | 23.20                | 130.35                         | 286.96                       | 48978.96              | 1463.64            | 25.20                    | 239.46                         |
| 4          | 0.58                 | 52.00                    | 24.39                | 509.56                         | 1157.06                      | 12773.62              | 362.99             | 42.70                    | 360.57                         |
| 5          | 2.07                 | 461.00                   | 5.13                 | 2336.74                        | 2415.13                      | 1286.08               | 173.90             | 128.00                   | 1407.19                        |
| 6          | 1.03                 | 92.10                    | 6.16                 | 240.37                         | 253.53                       | 14731.29              | 1656.60            | 90.50                    | 518.07                         |
| 7          | 1.88                 | 154.00                   | 5.61                 | 669.88                         | 702.47                       | 4834.72               | 597.89             | 135.00                   | 1285.10                        |
| 8          | 2.00                 | 468.00                   | 7.76                 | 1441.11                        | 1568.76                      | 2997.80               | 267.73             | 163.00                   | 1530.82                        |
| 9          | 4.00                 | 135.00                   | 3.70                 | 1189.18                        | 1204.24                      | 1862.97               | 348.77             | 170.00                   | 2047.80                        |
| 10         | 2.05                 | 94.50                    | 6.76                 | 634.35                         | 703.65                       | 5817.81               | 596.88             | 120.00                   | 1170.93                        |
| 11         | 1.98                 | 83.80                    | 8.45                 | 529.37                         | 614.93                       | 8324.74               | 683.00             | 66.20                    | 646.70                         |
| 13         | 2.00                 | 312.00                   | 3.51                 | 1809.91                        | 1832.69                      | 1159.85               | 229.17             | 136.00                   | 1676.47                        |
| 29         | 0.57                 | 215.00                   | 6.22                 | 983.08                         | 1038.79                      | 3626.89               | 404.32             | 104.00                   | 1246.90                        |
| Summary*   | 1.70<br>(0.90)       | 180.68<br>(151.99)       | 8.47<br>(6.96)       | 885.75<br>(649.96)             | 987.95<br>(644.59)           | 9055.22<br>(12699.20) | 661.25<br>(483.59) | 100.58<br>(49.30)        | 1018.05<br>(592.08)            |
| 840 mg     |                      |                          |                      | Parent drug                    |                              |                       |                    | Metabolite               |                                |
| Patient ID | T <sub>max</sub> (h) | C <sub>max</sub> (µg/mL) | t <sub>1/2</sub> (h) | AUC <sub>0-24h</sub> (h*µg/mL) | AUC <sub>0-∞</sub> (h*µg/mL) | Vd (L)                | CL (L/h)           | C <sub>max</sub> (µg/mL) | AUC <sub>0-24h</sub> (h*µg/mL) |
| 14         | 1.93                 | 220.00                   | 9.59                 | 1722.79                        | 2097.82                      | 5541.31               | 400.41             | 97.40                    | 1461.32                        |

|                 |                |                   |                |                     |                     |                      |                    |                   |                     |
|-----------------|----------------|-------------------|----------------|---------------------|---------------------|----------------------|--------------------|-------------------|---------------------|
| <b>15</b>       | 1.92           | 77.30             | 10.61          | 442.54              | 555.15              | 23151.75             | 1513.10            | 148.00            | 1361.60             |
| <b>16</b>       | 4.00           | 279.00            | 8.78           | 2633.33             | 3355.54             | 3171.83              | 250.33             | 110.00            | 1831.32             |
| <b>18</b>       | 4.00           | 83.60             | 5.37           | 868.06              | 912.80              | 7123.91              | 920.24             | 83.90             | 1275.70             |
| <b>19</b>       | 2.00           | 163.00            | 5.94           | 1040.90             | 1142.04             | 6304.47              | 735.52             | 195.00            | 2031.40             |
| <b>21</b>       | 2.00           | 328.00            | 12.49          | 1487.65             | 1919.95             | 7880.73              | 437.51             | 121.00            | 1089.99             |
| <b>22</b>       | 6.00           | 165.00            | 3.85           | 1949.93             | 1990.13             | 2343.72              | 422.08             | 235.00            | 2786.80             |
| <b>Summary*</b> | 3.12<br>(1.59) | 187.99<br>(94.17) | 8.09<br>(3.12) | 1449.31<br>(735.64) | 1710.49<br>(937.42) | 7931.10<br>(7006.53) | 668.46<br>(436.28) | 141.47<br>(55.26) | 1691.16<br>(581.85) |

Parameter estimates were obtained using noncompartmental analysis. Parameters reported in the table include maximum plasma drug concentration ( $C_{max}$ ), time to reach  $C_{max}$  ( $T_{max}$ ),  $t_{1/2}$  (terminal half-life), area under the plasma concentration-time curve from time zero to time of last measurable concentration ( $AUC_{0-24h}$ ), Area under the plasma concentration-time curve from time zero to infinity ( $AUC_{0-\infty}$ ), volume of distribution ( $V_d$ ), clearance ( $CL$ ) (data expressed as mean  $\pm$  SD).

**Table S12: Hazard ratios for associations between PK parameters and PFS**

| Parameter                                         | Unit change  | HR (95% CI)      | P-value |
|---------------------------------------------------|--------------|------------------|---------|
| C <sub>max</sub> (µg/mL)                          | 100 µg/mL    | 1.37 (0.76-2.48) | 0.29    |
| Dose-normalized C <sub>max</sub> (µg/mL/mg)       | 0.1 µg/mL/mg | 1.14 (0.90-1.43) | 0.28    |
| AUC <sub>0-24h</sub> (h*µg/mL)                    | 100 h*µg/mL  | 1.01 (0.90-1.13) | 0.89    |
| Dose-normalized AUC <sub>0-24h</sub> (h*µg/mL/mg) | 1 h*µg/mL/mg | 1.30 (0.68-2.48) | 0.42    |
| AUC <sub>0-∞</sub> (h*µg/mL)                      | 100 h*µg/mL  | 1.02 (0.92-1.12) | 0.75    |
| Dose-normalized AUC <sub>0-∞</sub> (h*µg/mL/mg)   | 1 h*µg/mL/mg | 1.04 (0.97-1.10) | 0.28    |
| CL (L/h)                                          | 100 L/h      | 0.90 (0.71-1.14) | 0.39    |

Statistics are from the Cox proportional hazards model for each PK parameter. The hazard ratios reflect the unit change listed, given that some of the parameters ranged between values in the thousands (i.e. the short-term risk of death or progression was 37% higher for a 100 µg/mL increase in C<sub>max</sub>). However, none of the parameters were significantly associated with progression-free survival. Martingale residuals were used to assess the linearity assumption of continuous variables in a proportional hazards model. The trends in residuals did not indicate the need for variable transformations in any models.

**Figure S1: Progression-Free and Overall Survival by Histologic Subtype**

A. The median progression-free survival was not reached for either histology. B. The median overall survival was similarly not reached for variant, and was 69.1 months for classic. There was no difference in progression-free or overall survival between histologic subtypes ( $p=0.88$  and  $p=0.76$ , respectively).

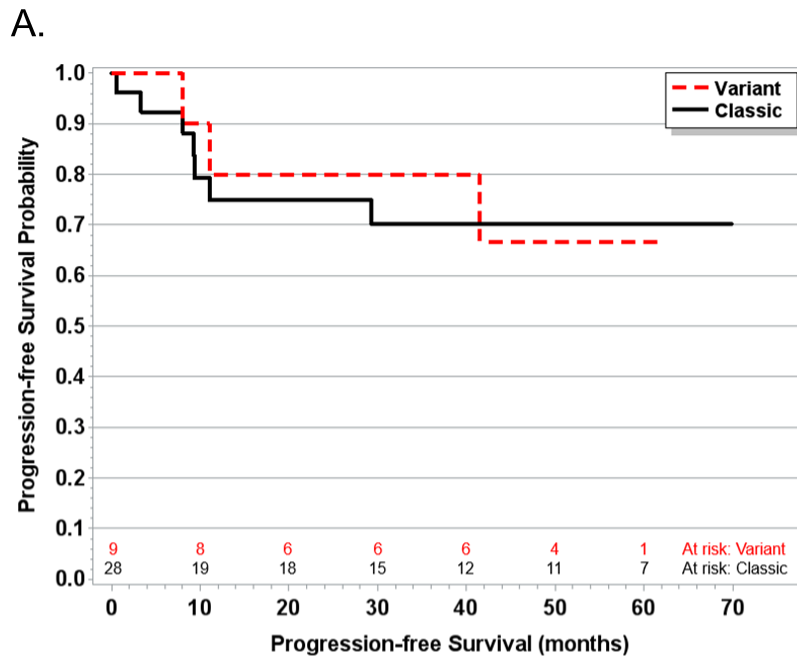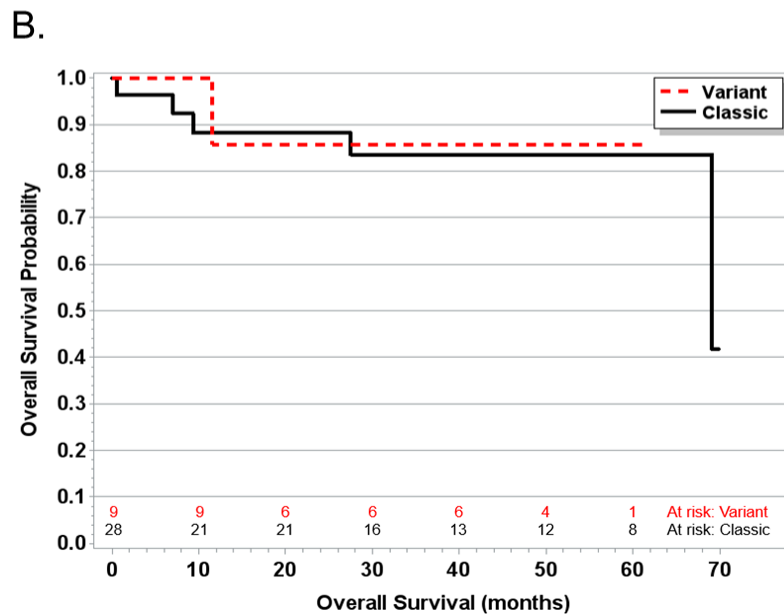

**Figure S2: Progression-Free and Overall Survival by Dose Level**

A. The median progression-free survival was not reached at either dose level. B. The median overall survival was similarly not reached at either dose level. There was no difference in progression-free or overall survival between dose levels ( $p=0.19$  and  $p=0.90$ , respectively).

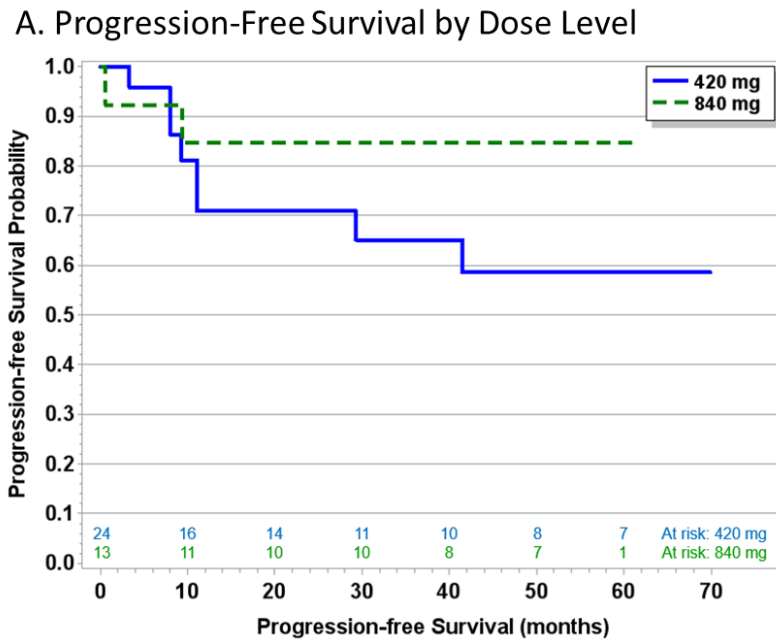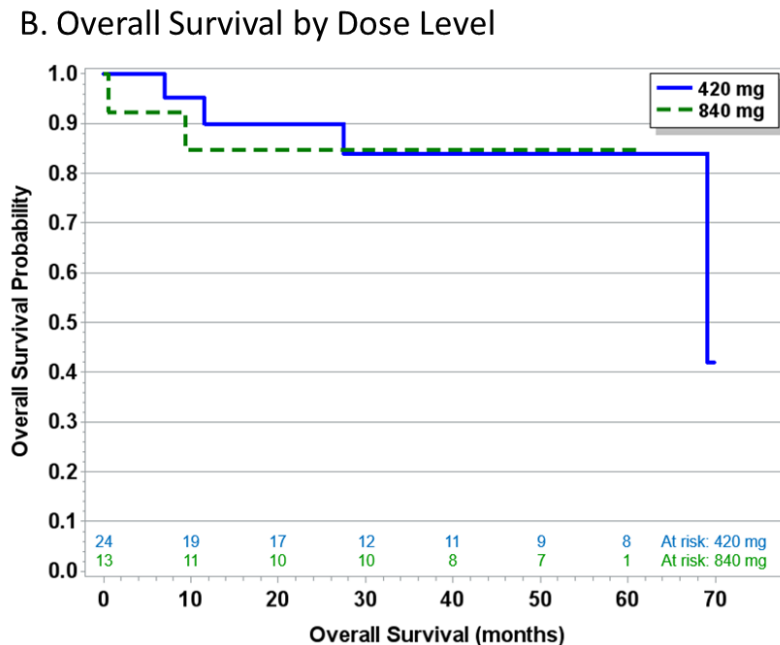

### Figure S3: Median Time to Recovery of Peripheral Blood Counts

Probability of recovering peripheral blood counts to above the threshold value for treatment over time. A. Median time to an absolute neutrophil count (ANC) >1,000/ $\mu$ L for patients with a baseline ANC below this level was 2 cycles (95% CI: 1.8-5). B. Median time to a platelet count >100,000/ $\mu$ L for patients with a baseline platelet count below this level was 5 cycles (95% CI: 2-8). C. Median time to a hemoglobin >11 g/dL for patients with a baseline value below this level was 5 cycles (95% CI: 1.3-7).

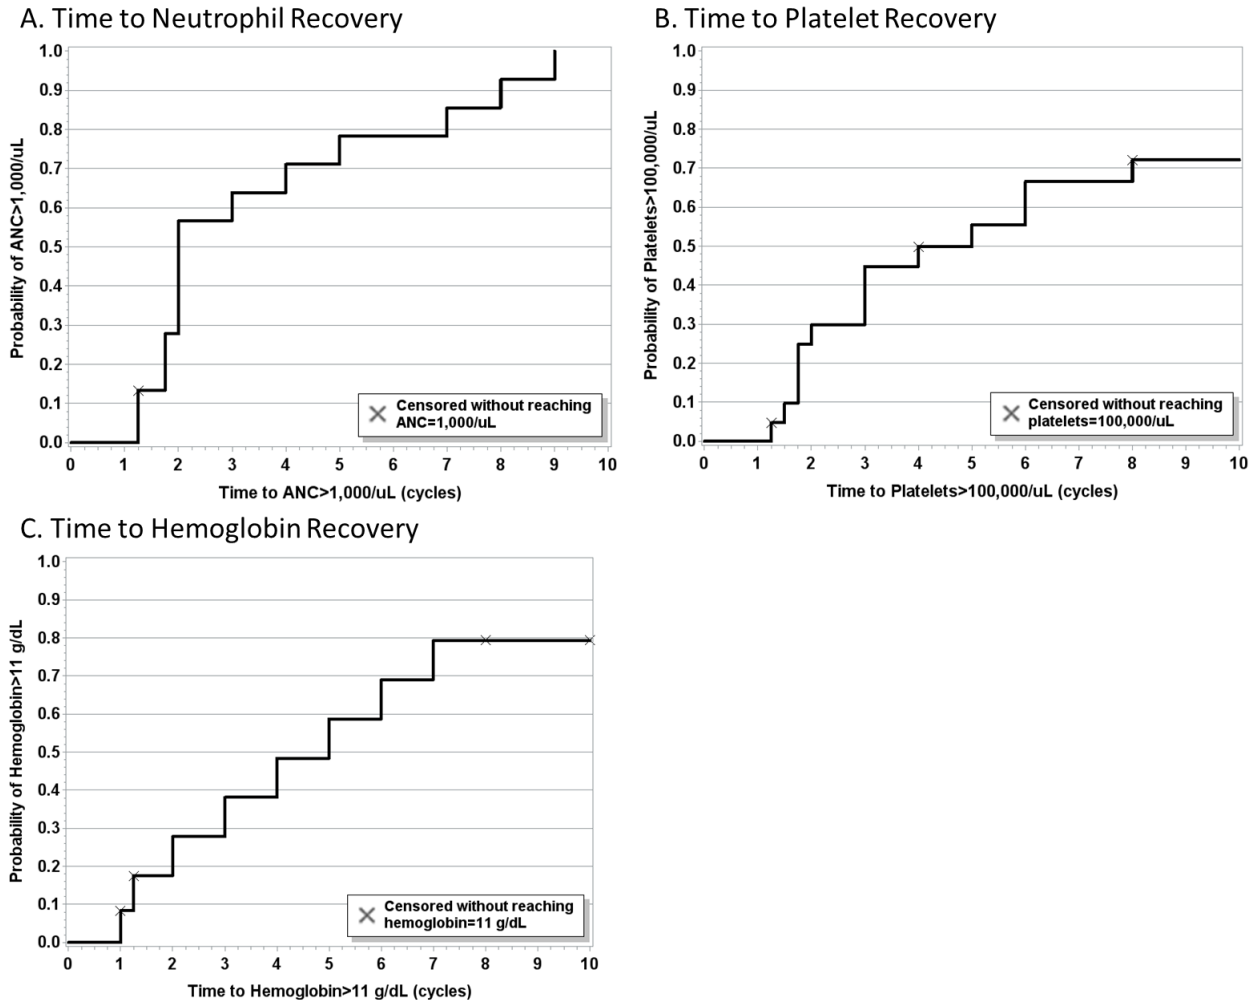

### Figure S4: Change in Peripheral Blood Counts During Treatment

The absolute change in blood counts from baseline are shown for absolute neutrophil count (A), absolute lymphocyte count (B), hemoglobin (C), and platelets (D). Color shows the best response achieved by that patient. Complete remission = CR, Partial remission = PR, stable disease = SD, progressive disease = PD, adverse event = AE.

A. Absolute Neutrophil Count (k/ $\mu$ L)

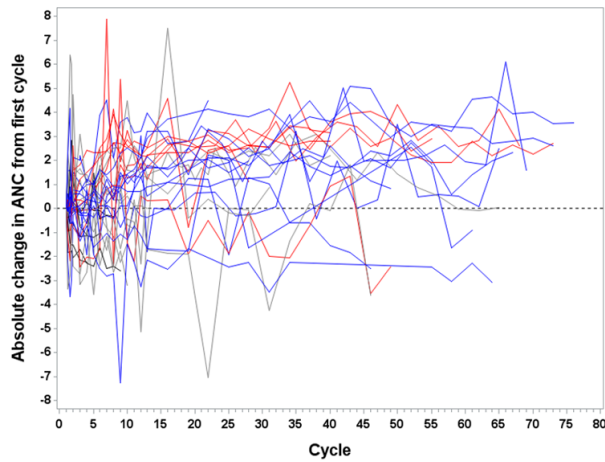

B. Absolute Lymphocyte Count (k/ $\mu$ L)

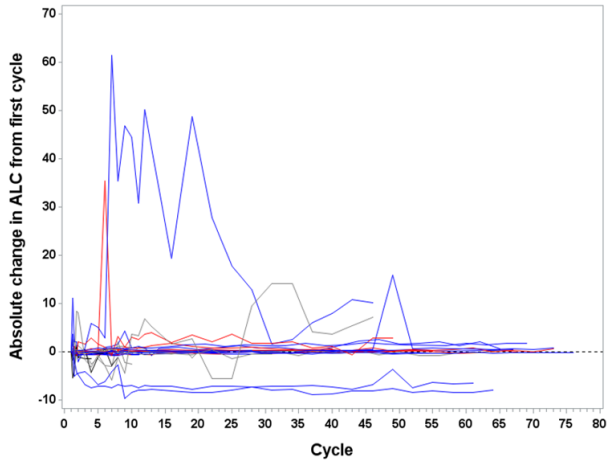

C. Hemoglobin (g/dL)

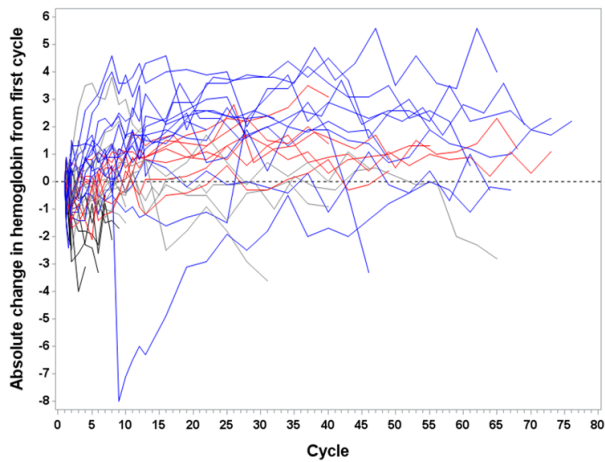

D. Platelets (k/ $\mu$ L)

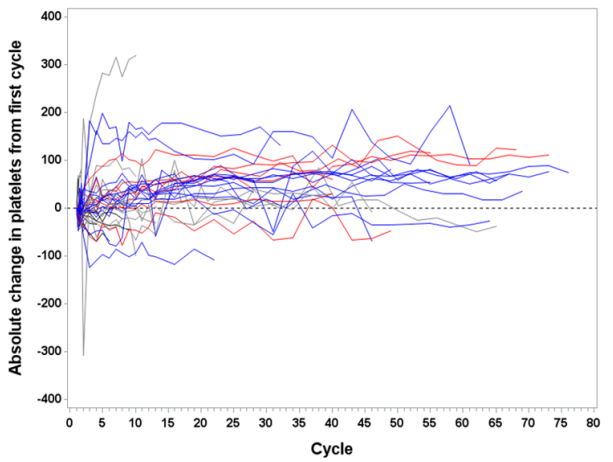

Response — CR — PR — SD — PD/Death/AE

## Figure S5: Plasma Concentration of Ibrutinib and Major Metabolite

A. Individual ibrutinib and ibrutinib metabolite (dihydrodiol ibrutinib) plasma concentration versus time data from two dose groups on days 1 and 8. B. Plots of mean ibrutinib and ibrutinib metabolite (dihydrodiol ibrutinib) plasma concentration versus time data plus individual data points are shown for days 1 and 8.

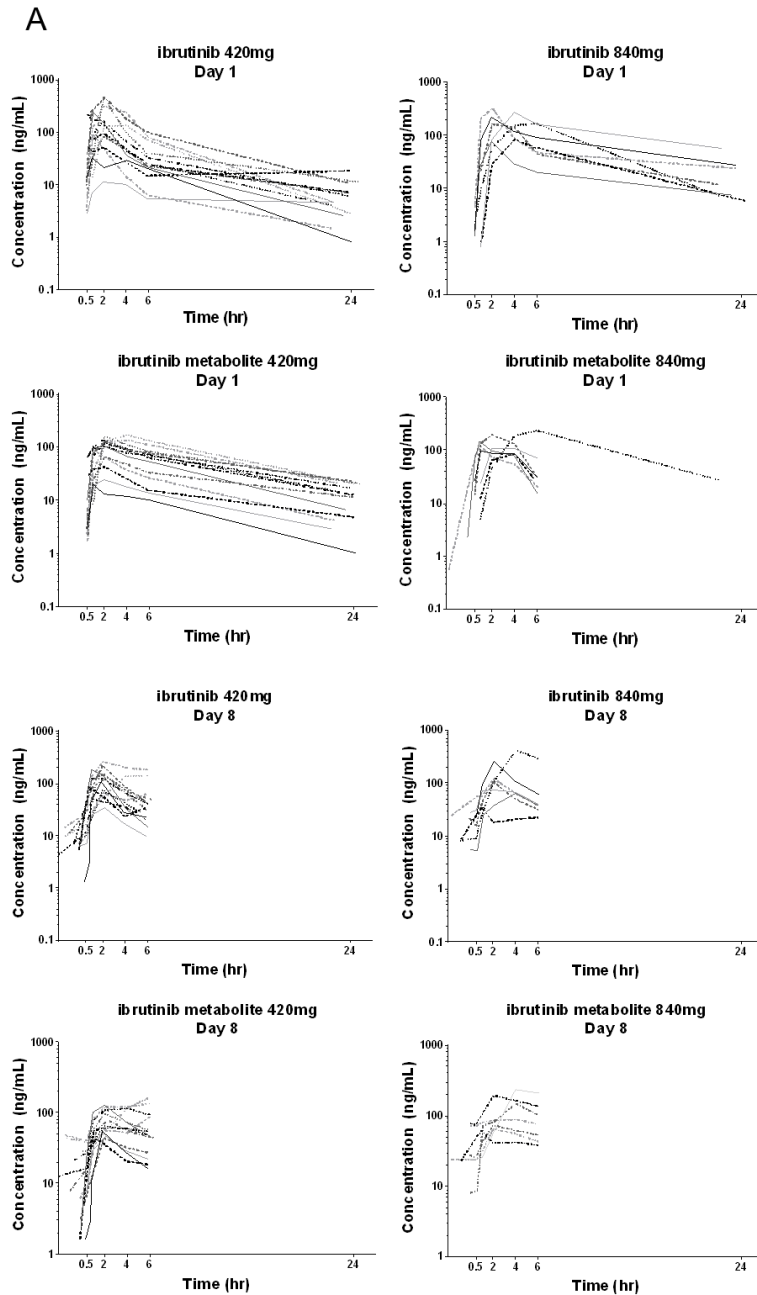



**B**

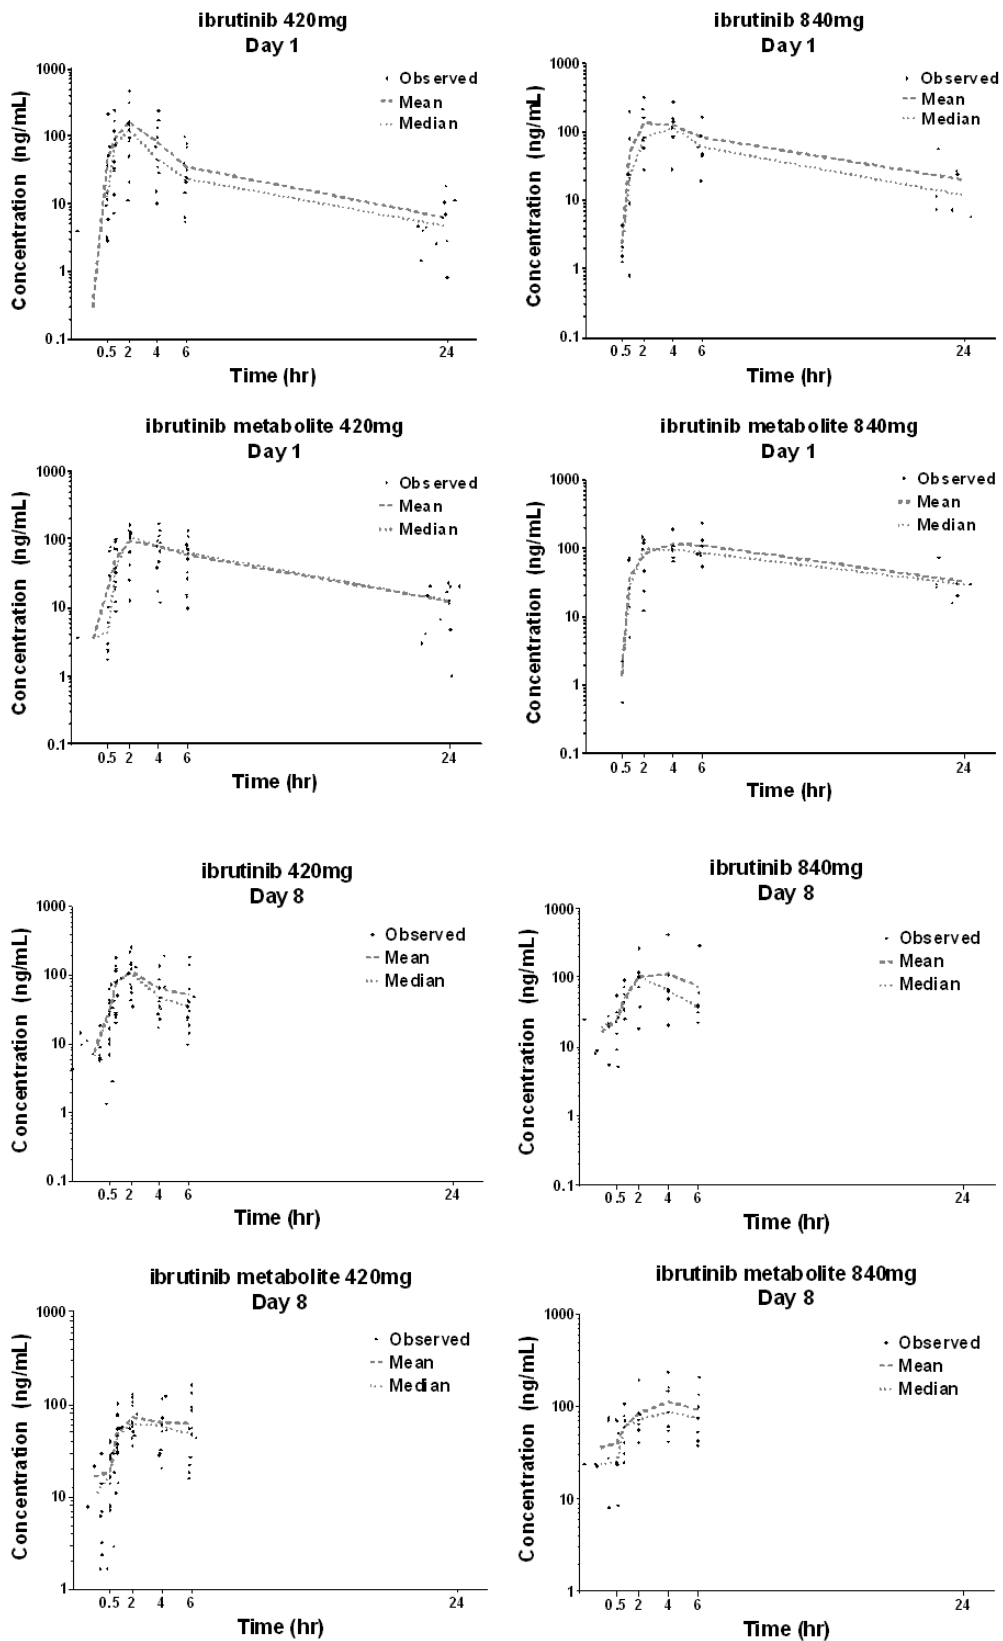

**Figure S6: Association of Pharmacokinetic Parameters and Response to Ibrutinib.**

Boxplots of PK vs. best response to ibrutinib. Groups were compared using nonparametric test (Kruskal-Wallis test) \*,  $p < 0.05$ .

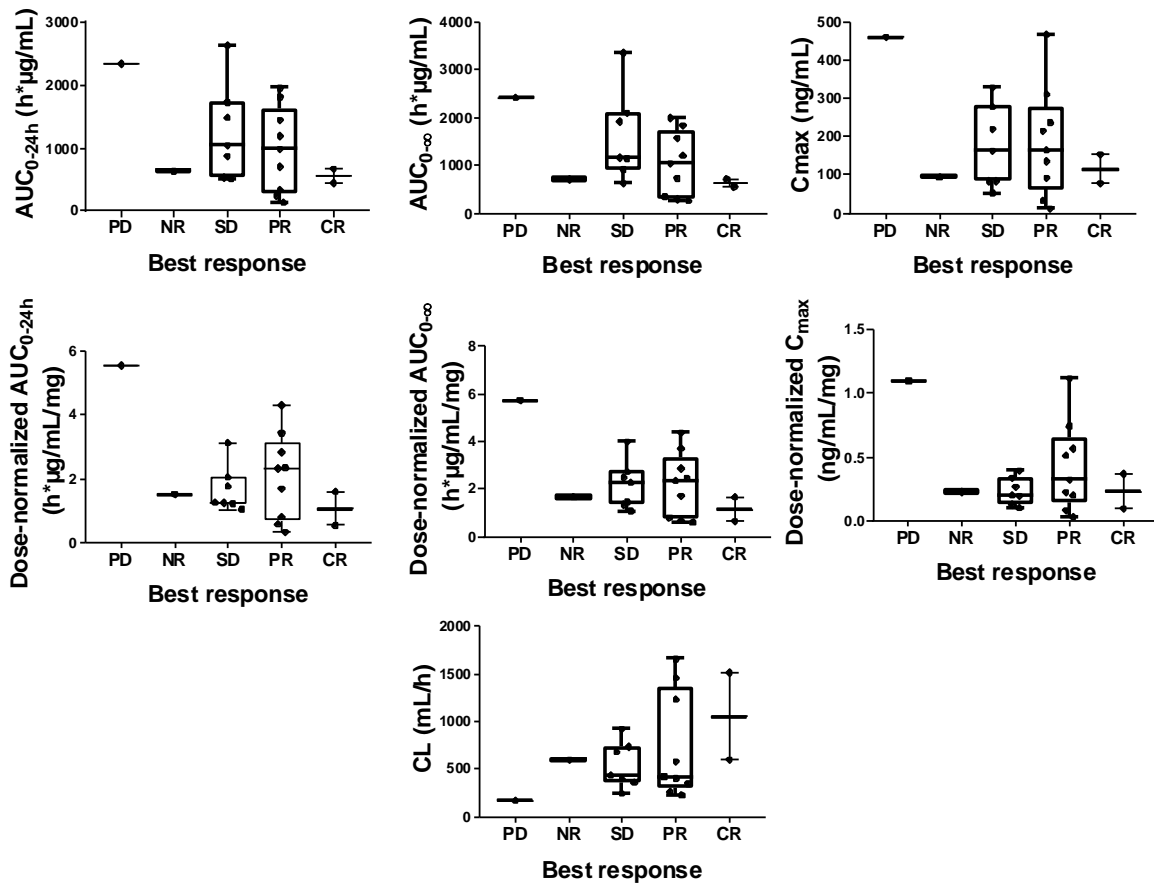

**Figure S7: Association of Pharmacokinetic Parameters and Disease Characteristics.**

Boxplots of PK vs. disease characteristics (a) disease histology (classical or variant), (b) *BRAF* mutation status, and (c) splenectomy status. Groups were compared using Mann-Whitney test. For the *BRAF* analysis, only unmutated and mutated groups were compared; No comparisons reach significance ( $p \leq 0.05$ ).

**A**

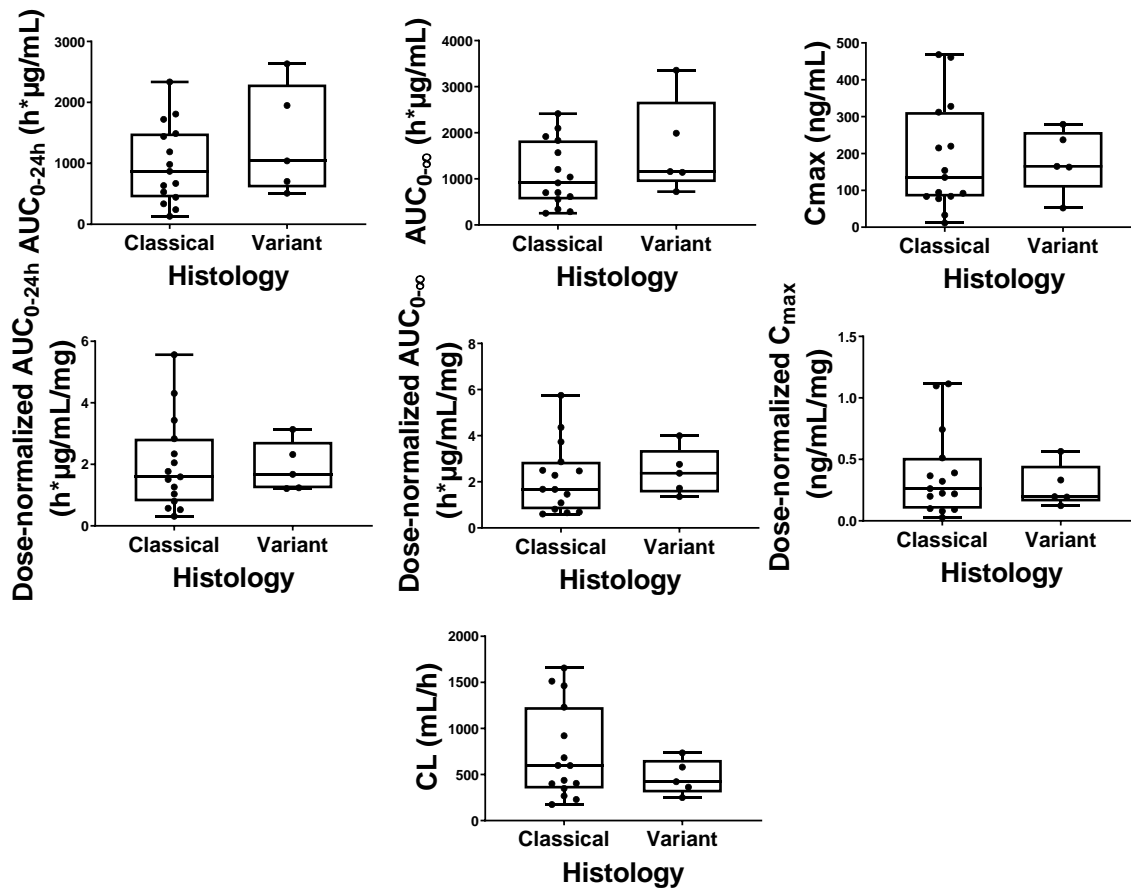

**B**

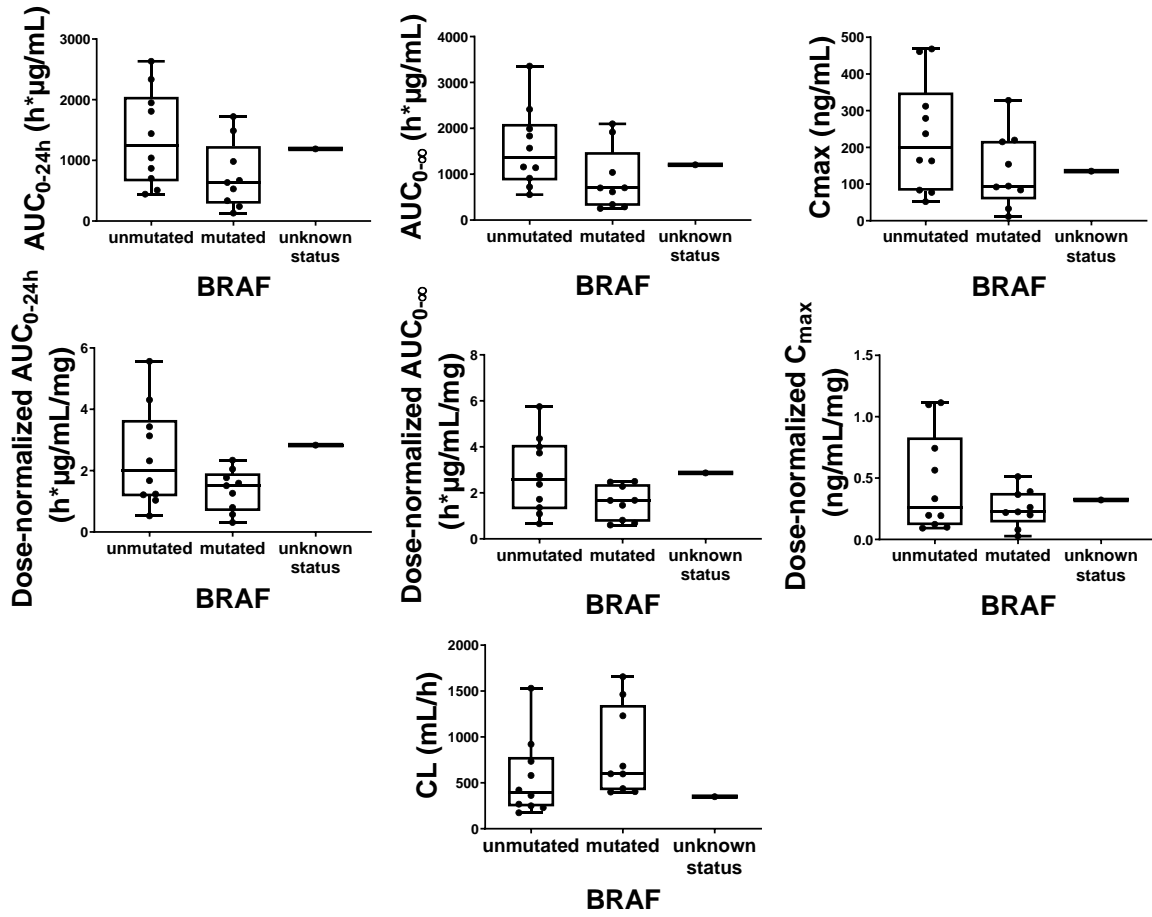

C

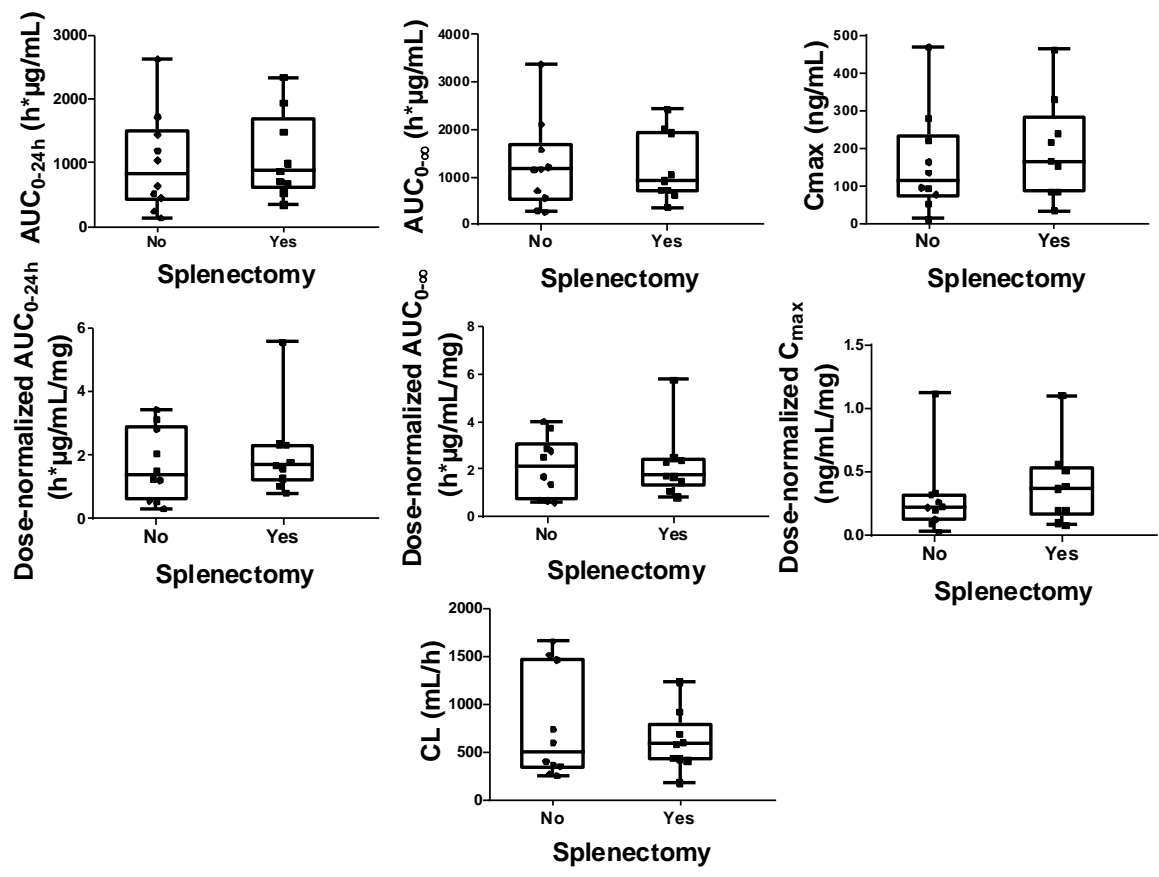

**Figure S8: Association of Pharmacokinetic Parameters and Adverse Events.**

Boxplots of PK parameters with presence of the adverse events of leukopenia (A), neutropenia (B), lymphopenia (C), anemia (D), thrombocytopenia (E), and bruising (F) with ibrutinib. Groups were compared using nonparametric test (Mann-Whitney test) \*,  $p < 0.05^{**}$ ;  $p < 0.01$ .

**A**

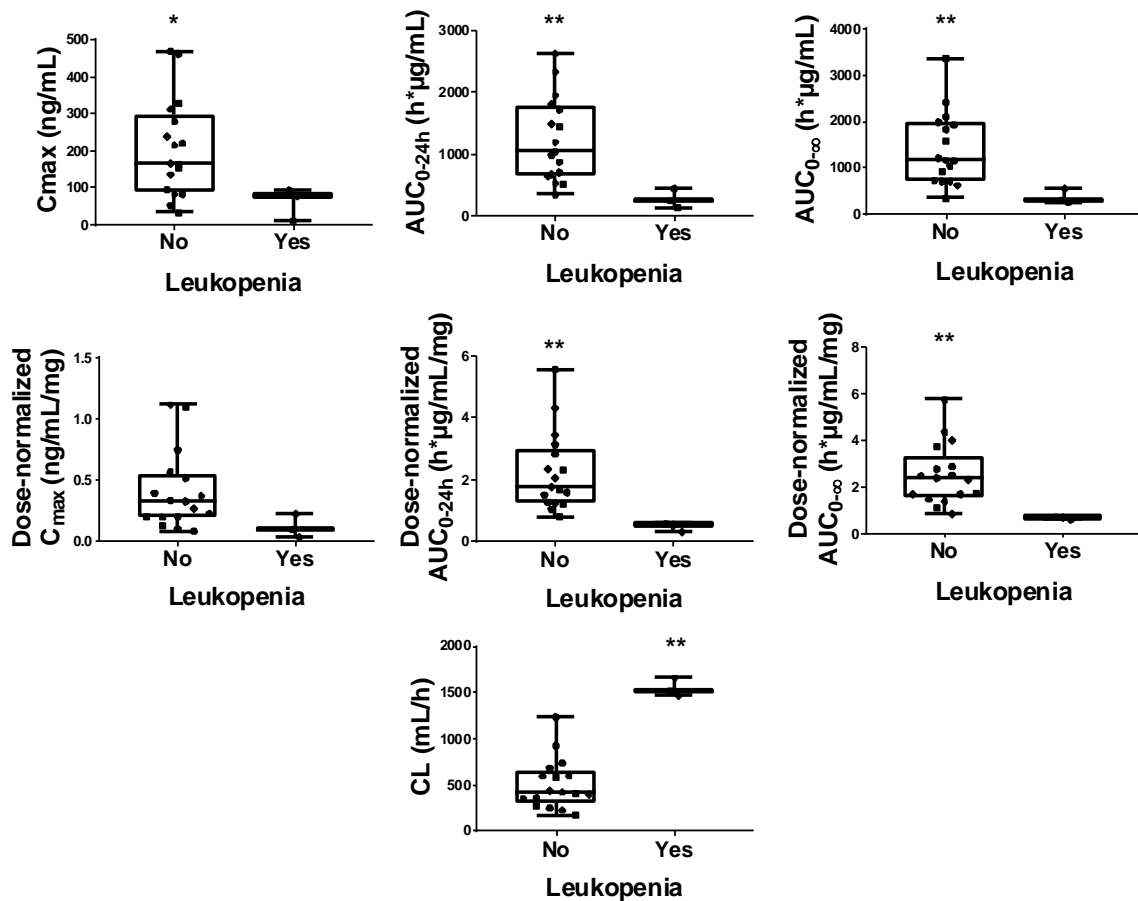

**B**

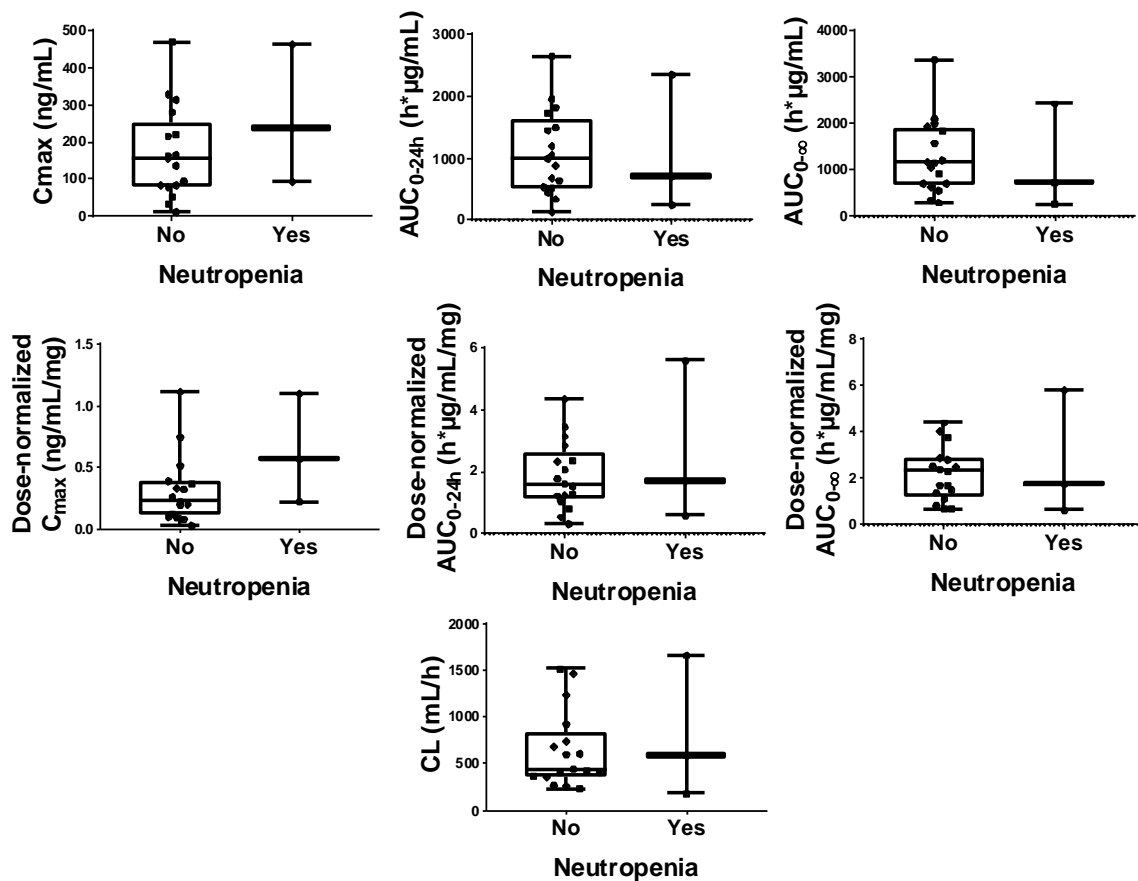

C

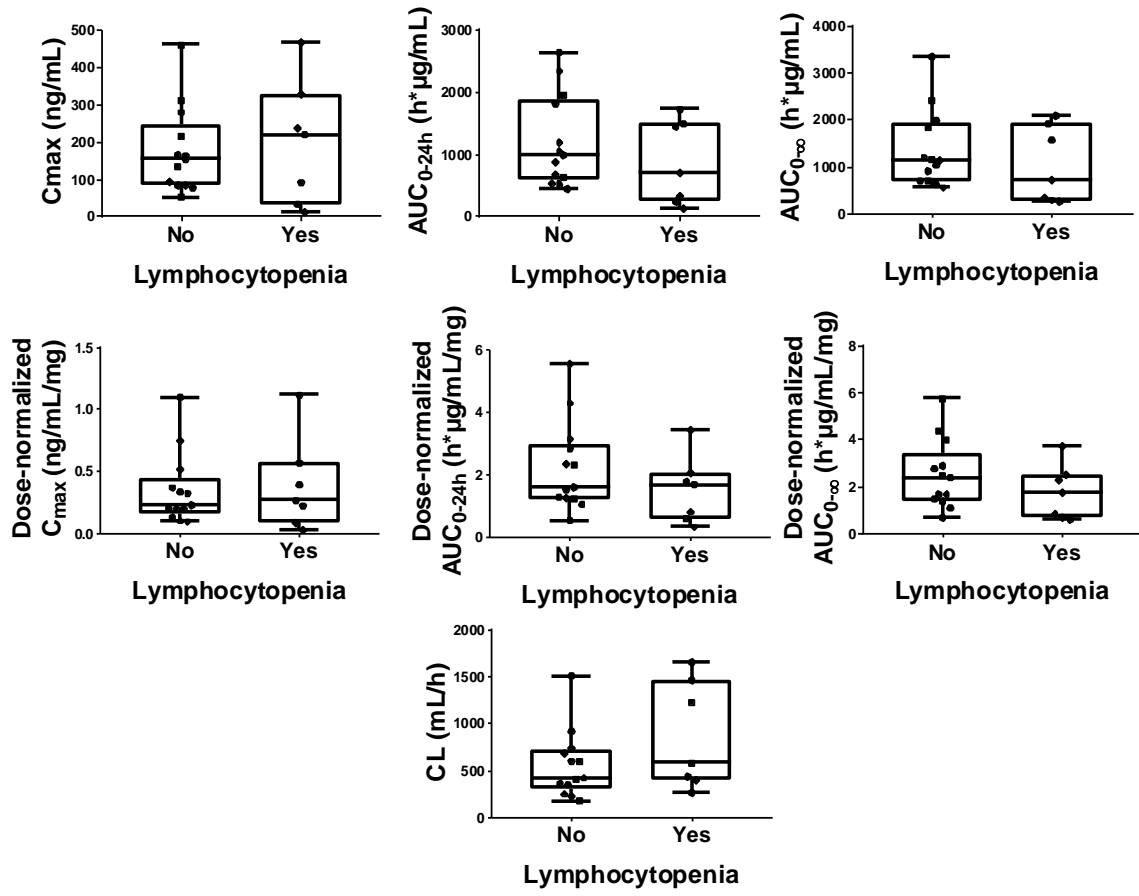



D

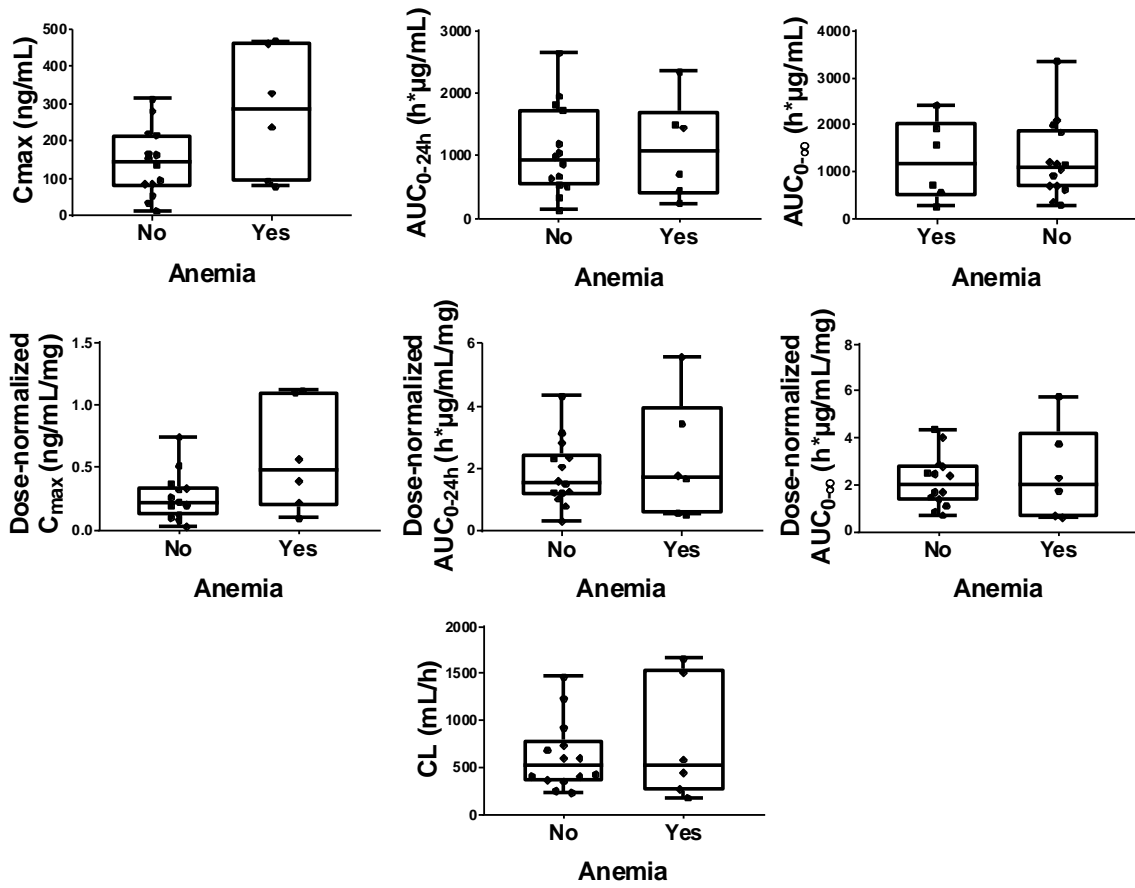

**F**

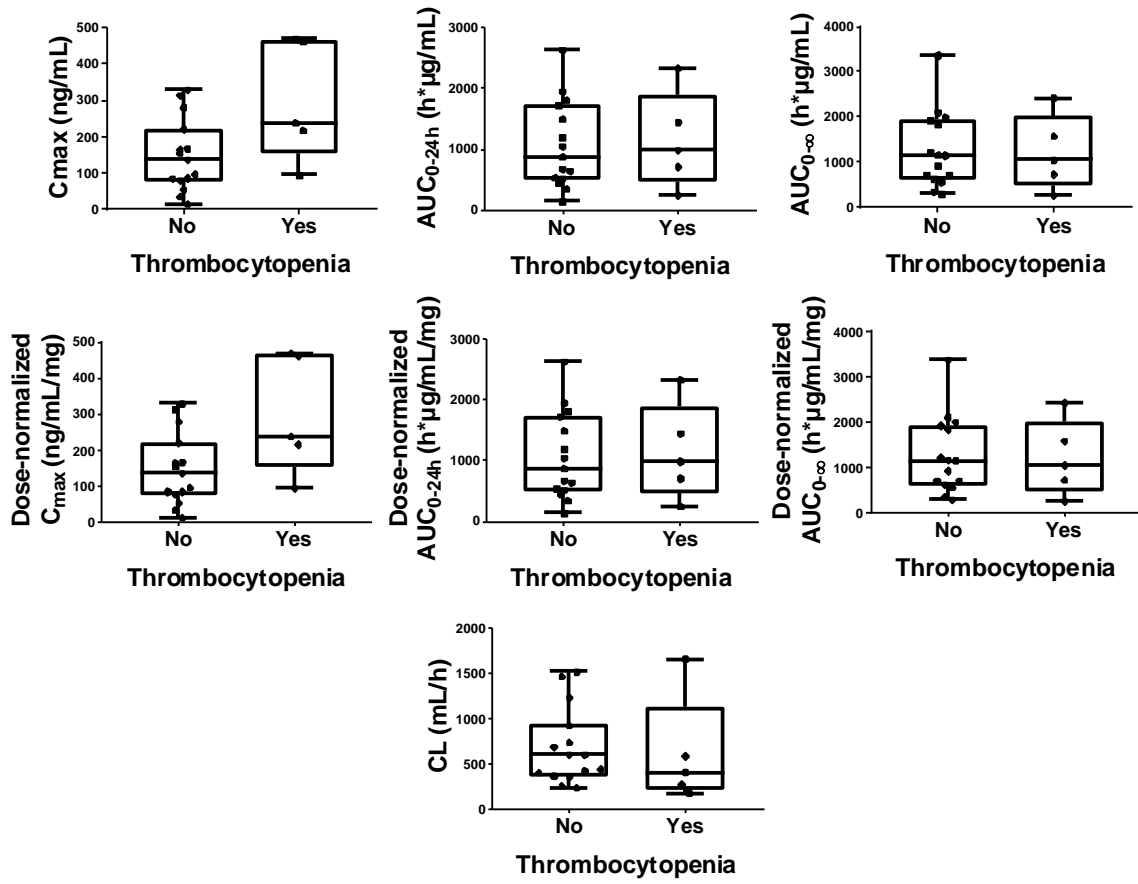

**F**

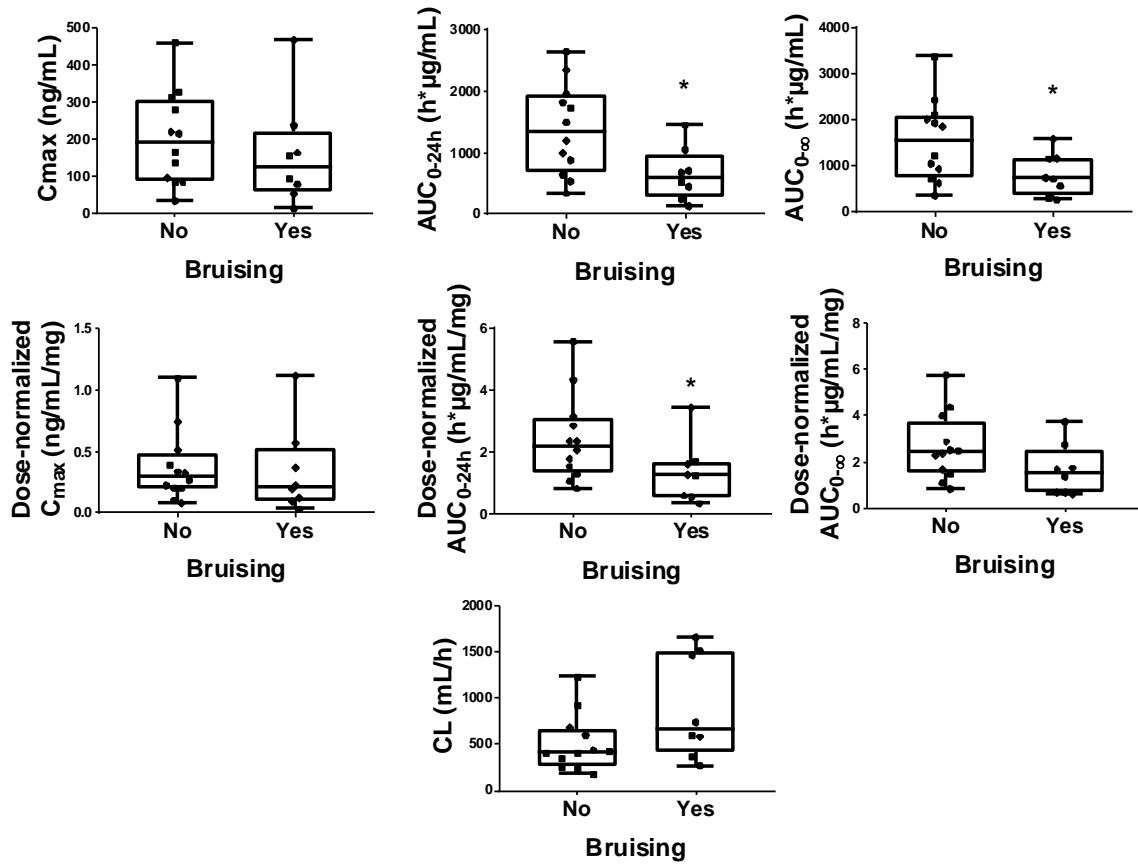

### Figure S9: Pharmacodynamic Measures

Absolute circulating CD19+ B-cells are shown over the first 4 weeks of ibrutinib treatment. Of 16 patients examined only 2 patients had a small trend towards increased circulating lymphocytes. Patients are divided into those with counts >500 cells per  $\mu\text{L}$  (A) and those without (B) to better observe the trends. C. Serum levels of immune globulins were determined at baseline and at 3, 6, 12, and 18 months after treatment. The percent change from baseline for individual patients are shown. IgG levels were significantly decreased from baseline at every time point (Kruskal-Wallis test, \*\*\*\*  $p < 0.0001$ ). There were no differences in IgM or IgA relative to their baselines.

A. CD19+ B-cell in the blood (>500/ $\mu\text{L}$ )

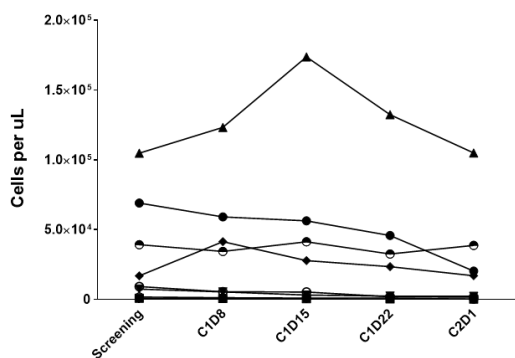

B. CD19+ B-cell in the blood (<500/ $\mu\text{L}$ )

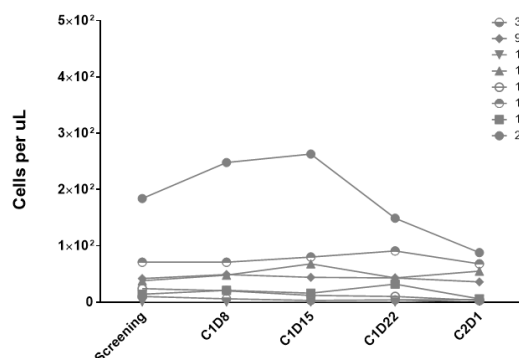

C. Immune globulin levels during ibrutinib treatment

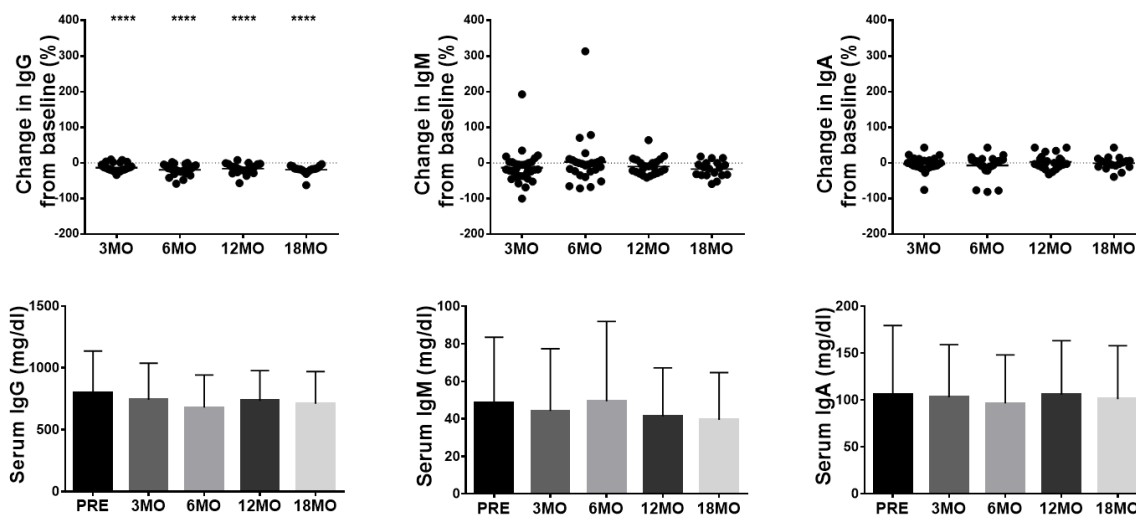

Supplement: bloodBLD2020009688-suppl1.pdf [file bloodBLD2020009688-suppl1.pdf]
